## Single-cell multi-omic analysis of the vestibular schwannoma ecosystem uncovers a nerve injury-like state

Thomas F. Barrett<sup>1†</sup>, Bhuvic Patel<sup>2†</sup>, Saad M. Khan<sup>2</sup>, Aldrin K.Y. Yim<sup>3</sup>, Sangami Pugazenthi<sup>2</sup>, Tatenda Mahlokozera<sup>2</sup>, Riley D.Z. Mullins<sup>1,3</sup>, Gregory J. Zipfel<sup>2</sup>, Jacques A. Herzog<sup>1</sup>, Michael R. Chicoine<sup>2</sup>, Cameron C. Wick<sup>1</sup>, Nedim Durakovic<sup>1</sup>, Joshua W. Osbun<sup>2</sup>, Matthew Shew<sup>1</sup>, Alex D. Sweeney<sup>4</sup>, Akash J. Patel<sup>4,5,6</sup>, Craig A. Buchman<sup>1</sup>, Allegra A. Petti<sup>2\*</sup>, Sidharth V. Puram<sup>1,3,7\*</sup>, Albert H. Kim<sup>2,3,8\*</sup>

†These authors contributed equally to this work.

\*Correspondence can be addressed to [apetti@mgh.harvard.edu](mailto:apetti@mgh.harvard.edu), [sidpuram@wustl.edu](mailto:sidpuram@wustl.edu), [alberthkim@wustl.edu](mailto:alberthkim@wustl.edu).

<sup>1</sup>Department of Otolaryngology-Head and Neck Surgery, Washington University School of Medicine, St. Louis, MO, USA.

<sup>2</sup>Department of Neurological Surgery, Washington University School of Medicine, St. Louis, MO, USA.

<sup>3</sup>Department of Genetics, Washington University School of Medicine, St. Louis, MO, USA.

<sup>4</sup>Department of Otolaryngology-Head and Neck Surgery, Baylor College of Medicine, Houston, TX, USA.

<sup>5</sup>Department of Neurosurgery, Baylor College of Medicine, Houston, TX, USA.

<sup>6</sup>Jan and Dan Duncan Neurological Research Institute, Texas Children's Hospital, Houston, TX, USA.

<sup>7</sup>Siteman Cancer Center, Washington University in St. Louis, St. Louis, MO, USA.

<sup>8</sup>Brain Tumor Center, Washington University School of Medicine/Siteman Cancer Center, St. Louis, MO, USA.

1 **ABSTRACT**

2 Vestibular schwannomas (VS) are benign tumors that lead to significant neurologic and otologic  
3 morbidity. How VS heterogeneity and the tumor microenvironment (TME) contribute to the  
4 pathogenesis of these tumors remains poorly understood. We performed scRNA-seq on 15 VS  
5 samples, with paired scATAC-seq in six samples. We identified diverse Schwann cell (SC),  
6 stromal, and immune populations in the VS TME and found that repair-like and MHC-II antigen  
7 presenting subtype SCs are associated with increased myeloid cell infiltrate, implicating a nerve  
8 injury-like process. Deconvolution analysis of RNA-expression data from 175 tumors revealed  
9 Injury-like tumors are associated with larger tumor size, and scATAC-seq identified transcription  
10 factors associated with nerve repair among SCs from Injury-like tumors. Ligand-receptor analysis  
11 and functional *in vitro* experiments suggested that SCs recruit monocytes. Our study indicates that  
12 Injury-like SCs may cause tumor growth via myeloid cell recruitment and identifies molecular  
13 pathways that may be targeted to prevent tumor progression.

## 14 INTRODUCTION

15 Vestibular schwannomas (VS) are benign tumors that arise from the Schwann cells (SCs) lining  
16 the vestibulocochlear nerve and account for 8% of all primary intracranial tumors<sup>1</sup>. These tumors  
17 most frequently arise sporadically (> 90%) but are also associated with the autosomal dominant  
18 syndrome neurofibromatosis type 2 (NF2) and the related, but rare syndrome, schwannomatosis.  
19 Due to their anatomic location adjacent to the brainstem, both tumor growth and current treatment  
20 strategies (*i.e.*, microsurgery and/or radiation therapy) can be associated with substantial, lifelong  
21 neurologic and otologic morbidity, including hearing loss, facial palsy, disequilibrium, brainstem  
22 compression, hydrocephalus, and, in extreme cases, death<sup>2-5</sup>. Recent epidemiologic evidence  
23 suggests that the lifetime prevalence of VS is as high as 1 in 500 adults, largely due to incidental  
24 detection of asymptomatic tumors, which has increased with increased clinical utilization of  
25 computed tomography (CT) and magnetic resonance imaging (MRI)<sup>6</sup>. However, our knowledge  
26 of the molecular drivers of VS pathogenesis remains limited.

27

28 Loss-of-function mutations in the *NF2* gene are believed to be the central oncogenic event in the  
29 development of VS, but it is unknown how this genetic aberration affects downstream pathways,  
30 intercellular interactions, and expression heterogeneity *in vivo*<sup>7-9</sup>. First identified in patients with  
31 NF2 in the early 1990s, many studies have since sought out the pathways altered by loss of the  
32 *NF2* gene product Merlin and have demonstrated its role in a number of known oncogenic  
33 pathways *in vitro*, including Ras/Raf/MEK/ERK<sup>10</sup>, mTORC1/2<sup>11</sup>, Rac/p21-PAK/c-Jun Kinase<sup>12</sup>,  
34 PI3K/AKT<sup>13</sup>, and Wnt/ $\beta$ -catenin<sup>14</sup>. However, pre-clinical and early clinical studies of targeted  
35 inhibitors of these pathways have shown negative or, at best, modest results in limiting tumor  
36 growth<sup>15-17</sup>. Only bevacizumab, an anti-angiogenic agent, has been shown to limit growth in a

37 subset of NF2 patients, but not without the risk of significant side effects<sup>18</sup>. Given the low burden  
38 of genomic alterations in VS, a deeper understanding of the molecular pathogenesis of VS may be  
39 advanced through detailed investigation of the transcriptional and epigenetic alterations in these  
40 tumors.

41  
42 Single-cell RNA sequencing (scRNA-seq) enables characterization of the cellular compartments  
43 of tumors (*e.g.*, malignant, stromal, immune, *etc.*), as well as identification of the expression  
44 heterogeneity that exists within each of these compartments, both within and across patients<sup>19</sup>.  
45 More recently, single cell assay of transposase accessible chromatin sequencing (scATAC-seq)  
46 has emerged as a means for epigenetically profiling distinct cellular subpopulations, providing  
47 insights into gene regulation and determination of cell fate that complements expression data<sup>20</sup>.  
48 However, no study to date has described both the transcriptional and epigenomic profile of the VS  
49 TME at single cell resolution, or more broadly, utilized a multi-omic approach to study VS.

50  
51 In this study, we performed scRNA-seq and scATAC-seq to characterize the expression  
52 heterogeneity and epigenetic states of cells comprising the VS TME. Within the SC compartment,  
53 we uncovered unexpected heterogeneity of SC phenotypes and found that VS-associated tumor  
54 Schwann cells (VS-SC) resemble repair-type SCs found in the setting of peripheral nerve injury.  
55 We found that a subset of tumors was enriched for repair-like cells and antigen presenting SC  
56 (“Injury-like VS”), while other tumors were characterized by low expression of these  
57 transcriptional profiles and higher expression of core markers of non-myelinating SC (“nmSC  
58 Core VS”). We also found monocytes/macrophages (herein referred to as myeloid cells) to be the  
59 most abundant immune cells in the VS TME, with their enrichment being correlated with higher



60 fractions of repair-like and MHC II antigen presenting VS-SCs. Through deconvolution of bulk  
61 RNA-seq and expression microarray datasets, we characterized tumors with high and low myeloid  
62 cell infiltrate as Injury-like and nmSC Core and found that Injury-like tumors were associated with  
63 larger tumor size. Epigenetic analysis of VS-SCs in these distinct tumor states identified regulatory  
64 transcription factors (TFs; *e.g.*, RUNX2, FOSL1, FOSL2) that are also expressed in the setting of  
65 peripheral nerve injury. Lastly, we explored the interactions between VS-SC and myeloid cells to  
66 identify candidate targets that might disrupt these interactions.

67

## 68 **RESULTS**

69 *Single cell transcriptional and epigenetic profiling identifies cellular diversity across the*  
70 *vestibular schwannoma tumor ecosystem*

71 We performed scRNA-seq transcriptional profiling of 15 sporadic VS with paired scATAC-seq  
72 profiling of six tumors to capture a detailed portrait of the human VS tumor ecosystem (Figure  
73 1A-B). After correcting for ambient RNA and removing doublets, low quality cells, and lowly  
74 expressed genes, we retained 112,728 high quality cells and 9,524 genes for downstream  
75 transcriptional analysis, and 31,578 cells with a median of 5,957 fragments per cell for downstream  
76 epigenetic analysis (Figure 1C-D, S1A).

77

78 We first assigned cell-type labels to cells within the scRNA-seq dataset using a cluster-based  
79 approach. We annotated clusters using differentially expressed genes and visualized them with  
80 Uniform Manifold Approximation and Projection (UMAP) (Figure 1C). This analysis revealed  
81 five overarching classes of cells: Schwann cells, fibroblasts, vascular (*e.g.*, pericytes and  
82 endothelial cells), immune (*e.g.*, monocytes/macrophages, T cells, NK cells, and small populations

83 of mast cells and B cells) and cycling cells. One additional cluster was characterized by expression  
84 of epithelial markers (*KRT1*, *SLPI*) and was almost exclusively derived from one tumor (SCH4).  
85 These cells were likely derived from temporal bone mucosa in the surgical field that were  
86 incidentally captured during specimen collection and were therefore excluded from further  
87 analysis. Among tumor SCs, there were two distinct clusters: One characterized by typical markers  
88 of myelinating SCs (myeSC), including *PRX* and *MPZ*<sup>21</sup>, and another, larger SC cluster expressing  
89 genes associated with VS and a non-myelinating SC identity (nmSC), including *S100B*, *SOX10*,  
90 *NRXN1*, *SCN7A* with lack of *PRX* expression (Figure 1E)<sup>22</sup>. To confirm our cell type  
91 classifications, we scored all cells in our data with gene signatures derived from published scRNA-  
92 seq peripheral nerve transcriptomic atlases<sup>21,23–26</sup>. We found strong concordance between our cell-  
93 type labels and both the individual prior study labels (Figure S1B) as well as the aggregated meta-  
94 signature scores for these cell-type signatures (Figure 1F).

95  
96 Next, we analyzed the six samples with paired scATAC-seq data. After filtering for low quality  
97 cells and doublets (Figure S2A-C), we performed dimensionality reduction (Figure 1D) and an  
98 initial cluster-based analysis using marker genes derived from gene accessibility, as was performed  
99 with scRNA-seq data (Figure S2D). Unconstrained pairing of scRNA-seq cells with cells in the  
100 scATAC-seq atlas based on shared transcriptional and gene score profiles showed excellent  
101 overlap with the *a priori* scATAC cluster-based assignments (Figure S2E-H), suggesting that we  
102 retained all major VS TME cell-type classes in the scATAC-seq data and allowing us to reliably  
103 perform integrative downstream analysis combining transcriptional and epigenetic data on an  
104 individual cell basis.

105

106 *VS-SC adopt diverse functional states*

107 VS typically carry a low tumor mutational burden, with the most common genetic aberrations  
108 being *NF2* loss of function mutations and loss of chromosomal arm 22q<sup>27</sup>. We inferred copy  
109 number alterations (CNA) of single cells using CONICSm<sup>28</sup>. As expected, we observed  
110 enrichment for CNA within the SC clusters relative to other cell types (Figure 2A) consistent with  
111 these being the tumorigenic cells of VS. Notably, 22q loss was observed in 4 of our 15 samples  
112 and was almost exclusive to the nmSC cluster. Based on our clustering analysis, SCs harboring  
113 22q loss did not significantly differ transcriptionally from cells without 22q loss, suggesting that  
114 VS-SC functional states may converge downstream of initial mutagenic events.

115

116 Next, we obtained publicly available RNA microarray expression datasets that compared gene  
117 expression in VS samples relative to control nerves (n = 125 tumor samples; GSE141801<sup>29</sup>,  
118 GSE39645<sup>30</sup>, and GSE108524<sup>31</sup>) and compared expression of the top 50 differentially expressed  
119 genes (DEGs) defining the nmSC and myeSC clusters between tumors and normal nerves in the  
120 microarray data (Figure 2B, Figure S3A). The gene signature defining VS-nmSC was markedly  
121 enriched in tumors relative to normal nerves across all 3 datasets, consistent with prior work  
122 suggesting VS-SC lose their differentiated, myelinating phenotype in favor of a less differentiated,  
123 non-myelinating phenotype<sup>32</sup>. Interestingly, there was mixed upregulation and downregulation of  
124 VS-myeSC associated genes in tumors relative to normal nerve controls, with a notable decrease  
125 in expression of canonical myelination markers (*e.g.*, *PRX*, *MLIP*, *NFASC*, *NCMAP*, *FGFBP2*).  
126 The mixed expression pattern of myeSC markers in tumors relative to normal nerve may represent  
127 the capture of normal bystander myeSCs or may suggest that VSs harbor a subpopulation of SCs  
128 that exist in an intermediate state before losing their myelination phenotype. Overall, this analysis

129 served as further evidence that the VS-SC in the scRNA-seq data were indeed the tumorigenic  
130 cells of interest.

131  
132 We next sought to characterize the functional states of the VS tumor SCs both *within* and *across*  
133 tumors. We selected the myeSC and nmSC clusters from the full scRNA-seq dataset and  
134 reanalyzed them by performing dimensionality reduction and batch correction, revealing ten SC  
135 subclusters, which we narrowed down to eight meta-clusters based on transcriptional similarities  
136 identified using hierarchical clustering (Figure 2C, Figure S3B), differential expression analysis  
137 (Figure 2D), and gene ontology enrichment analysis for biologic processes (GOBP, Figure S3C).  
138 A similar approach was taken to classify the other cell types comprising the VS TME (Figure S4).

139  
140 We identified clusters associated with myelination (*e.g.*, *PRX*, *NCMAP*), hypoxia (*e.g.*, *VEGFA*,  
141 *HILDPA*), cell stress (*e.g.*, *JUNB*, *FOSB*), and interferon-response (*e.g.*, *ISG15*, *IFIT1*). Two  
142 clusters of cells expressed core markers of nmSC identity, including *NRXN1*, *SCN7A*, and *NCAMI*,  
143 and largely lacked expression of the other VS-SC clusters (“core”). Interestingly, we noted cells  
144 enriched for genes associated with MHC class II antigen presentation (*e.g.*, *CD74*, *HLA-DRB1*),  
145 consistent with SCs in the post-nerve injury setting, which are known to upregulate the antigen-  
146 presenting machinery to recruit circulating immune cells and promote their proliferation<sup>33</sup>.  
147 Furthermore, two clusters had increased expression of *NGFR*, *RUNX2*, *SPPI1*, and *GAP43*, all of  
148 which are upregulated in the setting of peripheral nerve injury (“repair-like”)<sup>34–37</sup>.

149  
150 Prior studies of VS have suggested that tumorigenic SCs adopt a de-differentiated, immature SC  
151 phenotype, while others have suggested that VS-SCs resemble “repair Schwann cells” in the

152 setting of an acute nerve injury<sup>38</sup>. To better understand the phenotypes of VS-SC, we used  
153 transcriptional signatures from murine Schwann cells reported in scRNA-seq analyses of  
154 peripheral nerves in multiple contexts, including steady-state adult, early development, and post-  
155 injury<sup>23,24,26</sup>. Scoring the VS-SCs for each of these signatures indicated that VS-SCs most closely  
156 resemble SCs after peripheral nerve injury (Figure 2E). Interestingly, VS-SCs scored low for  
157 cycling SC markers seen in these settings. Together, these findings suggest that VS-SC  
158 downregulate myelination-associated genes, upregulate gene expression programs that promote  
159 nerve repair and immune cell recruitment, and largely remain in a non-proliferative state.

160

#### 161 *VS TME immune cells are disproportionately cycling*

162 The observation that VS-SCs do not strongly express markers of proliferation motivated us to  
163 return to our analysis of the broader cell type composition of the VS TME, in which we observed  
164 a distinct cluster of cells that was driven by cell cycle marker expression (Figure 1C). After  
165 assigning these cells to the VS cell type they most closely resembled, we found that VS-SC and  
166 stromal cells were underrepresented whereas immune cells were overrepresented in the cycling  
167 cell cluster (Chi-squared test,  $p < 0.001$ ; Figure 3A). Next, we turned our attention to all cells  
168 across the entire dataset, excluding the cycling cell cluster. We scored each cell type for cell cycle  
169 markers and found that immune cells collectively scored higher for both S-Phase and G2M-Phase  
170 markers (ANOVA  $p < 0.001$ ; Figure 3B). To validate these observations, we performed  
171 immunohistochemical staining of the same tumors used for scRNA-seq. We used CD45 to identify  
172 immune cells and Ki67 to identify cycling cells (Figure 3C). Consistent with our scRNA-seq  
173 analyses, we found that a higher proportion of CD45 positive cells were Ki67 positive than CD45

174 negative cells (Figure 3D). Together, these findings suggested that immune cells in the VS TME  
175 are disproportionately proliferative and therefore may play a vital role in tumor progression.

176

177 *VS tumors enriched for nerve injury-related subtypes are associated with increased myeloid cell*  
178 *infiltrate*

179 We next sought to characterize the degree to which VS-SC subtypes varied across samples (*i.e.*,  
180 *inter-tumoral* heterogeneity). We assigned subtype scores to each sample by first scoring all VS-  
181 SCs for each meta-cluster signature and then taking the mean for each signature. Unsupervised  
182 hierarchical clustering of these sample scores revealed two groups of tumors, one enriched for  
183 repair-like and MHC II signatures (“Injury-like”) and the other enriched for the core signature  
184 (“nmSC Core”) (Figure 4A). These groups differed most by their expression of the repair-like,  
185 MHC II, and core programs (Figure 4B; multiple comparisons corrected for with BH method, FDR  
186  $< 0.2$ ). Interestingly, we found that both the repair-like ( $R = 0.77, p < 0.05$ ) and MHC II ( $R = 0.61,$   
187  $p < 0.05$ ) scores were associated with an increased fraction of myeloid cells (Figures 4C). The core  
188 meta-signature scores did not correlate with degree of myeloid infiltrate. These findings suggest  
189 that the VS can be broadly divided into two groups – Injury-like VS and nmSC Core VS – based  
190 on the composition of their TME.

191

192 *VS-associated myeloid cells have properties of tumor-associated macrophages and acute*  
193 *inflammatory cells*

194 Since myeloid cells were the most abundant immune cell type in our dataset and therefore might  
195 play a role in the pathogenesis of VS, we sought to better characterize the diversity of their  
196 functional phenotypes. Given their lack of discrete states, as has been observed in other scRNA-

197 seq studies of human tumors<sup>39</sup>, we utilized a previously described implementation of non-negative  
198 matrix factorization (NMF) to identify gene expression programs that recurred across samples (*i.e.*,  
199 “meta-programs” (MP))<sup>40</sup>. Using this approach, we identified 69 distinct gene expression programs  
200 across patients, of which eight MPs exhibited similar expression across patient samples (Figure  
201 S4E-F). Each MP was then annotated according to its functional enrichment. We used gene  
202 signatures from recently published pan-cancer and pan-tissue scRNA-seq atlases of myeloid cell  
203 phenotypes to evaluate the VS myeloid MP signatures in the context of these integrative  
204 resources<sup>39,41</sup>. As expected, we saw marked overlap between the VS myeloid inflammatory MP  
205 and pan-cancer M1 signature, the VS angiogenic MP and pan-cancer signatures, and the VS  
206 phagocytic MP and pan-cancer signatures (Figure S4G). The pan-cancer M2 signature was less  
207 specific, with M2-associated genes expressed across several VS myeloid MPs (*e.g.*, phagocytic,  
208 angiogenic, migratory, and granulocytic). This is consistent with more recent observations that  
209 macrophages take on a variety of transcriptional states *in vivo* beyond the traditional M1/M2  
210 states<sup>42</sup>. Interestingly, when looking at pan-tissue signatures comparing cancer and inflammatory  
211 associated monocytes and macrophages, some VS myeloid cells (*e.g.*, granulocytic, angiogenic,  
212 and inflammatory) expressed markers associated with the *inflammatory* monocytic signature while  
213 others (*e.g.*, phagocytic, migratory, and oxidative phosphorylation) expressed *cancer*  
214 monocyte/macrophage signature genes (Figure S4H). Our analysis suggests that many VS myeloid  
215 cells are monocytic in origin with pro-inflammatory, M1-like signatures, while other subsets  
216 appear to adopt a spectrum of phenotypes resembling M2-like macrophages.

217

218 *Myeloid cell infiltration varies across tumors and is associated with tumor size*

219 To assess the cellular composition of the TME in a larger cohort of patients, we used previously  
220 described deconvolution methods on VS tumors characterized with bulk transcriptomic  
221 approaches (*i.e.*, RNA-seq and expression microarray)<sup>43</sup>. Using our scRNA-seq gene expression  
222 data to define a cell-type signature matrix, we performed digital cytometry using CIBERSORTx  
223 on a cohort of 22 newly sequenced tumors combined with bulk transcriptomic data (153 tumors)  
224 from previously published reports<sup>27,29–31,44</sup>. Interestingly, we noticed a marked variability in the  
225 proportion of immune cells across tumors (Figure 4D). Furthermore, increasing immune cell  
226 infiltrate was strongly correlated with the imputed fraction of myeloid cells ( $R = 0.93$ ,  $p < 2.2e^{-16}$ )  
227 and only weakly correlated with the fraction of T cells ( $R = 0.26$ ,  $p = 0.00021$ ; Figure S5A),  
228 suggesting that variability in immune cell composition is primarily driven by the fraction of  
229 myeloid cells. Inversely, the fraction of nmSC was anti-correlated with the fraction of immune  
230 cells ( $R = -0.8$ ,  $p < 2.2e^{-16}$ ; Figure S5A).

231  
232 Next, we performed unsupervised hierarchical clustering of the imputed cell fractions from each  
233 cohort of bulk expression samples. We found that each dataset could be classified into two distinct  
234 cohorts of tumors. One group was characterized by a lower proportion of nmSCs and high myeloid  
235 cell infiltrate, reminiscent of the Injury-like VSs in the scRNA-seq analysis, which we labeled  
236 “Injury-like”. The other group was characterized by a predominance of nmSCs and low imputed  
237 fractions for all other cell types including macrophages, which we labeled “nmSC Core” (Figure  
238 4E, Figure S5B-F). We then assessed whether the Injury-like and nmSC Core cohorts were  
239 associated with any clinical parameters of interest. Notably, the nmSC Core tumor group was  
240 overrepresented in NF2 syndrome-associated tumors (Figure 4F, Fisher’s exact test,  $p = 0.01149$ ).  
241 Furthermore, large tumors ( $\geq 2$  cm in greatest axial dimension or Hannover Scale  $\geq 3a$ ) were



242 disproportionately associated with the Injury-like cohort, while small tumors were  
243 disproportionately classified as nmSC Core (Figure 4F, Fisher's exact test,  $p = 0.01361$ ).  
244 Comparison of other clinical parameters of interest (prior radiation, hearing loss, tinnitus, vertigo,  
245 and tumor consistency) did not reveal any significant associations (data not shown). Thus, across  
246 a large cohort of patients, the Injury-like tumor composition is associated with larger tumor size.

247

248 *Analysis of chromatin accessibility in Injury-like VS-SC identifies TFs enriched in peripheral*  
249 *nerve injury*

250 Given that Injury-like and nmSC Core VS-SCs differ transcriptionally, we wanted to characterize  
251 how these cells might differ epigenetically. We therefore turned our attention to the VS-SCs in the  
252 scATAC-seq dataset, which was comprised of three Injury-like and three nmSC Core tumors based  
253 on scRNA-seq analysis (Figure 4A). Indeed, after selecting scATAC-seq VS-SCs, and assigning  
254 them to either Injury-like or nmSC Core groups based on the tumor from which they were derived,  
255 we observed that the Injury-like and nmSC Core cells were distributed differently across UMAP  
256 space (Figure 4G). Accordingly, analysis of differentially accessible peaks (DAPs) identified 5616  
257 statistically significant marker peaks with  $\text{Log}_2\text{FC} \geq 2$  differentiating the two groups of VS-SCs  
258 (Figure S6A-B), further suggesting that these two groups of VS-SCs differ from each other  
259 significantly at the epigenetic level. Next, we performed TF motif enrichment analysis on a per-  
260 cell level based on accessibility of TF binding sites from CIS-BP. We then identified relevant TFs,  
261 defined as TFs with gene expression (either inferred from scATAC-seq data or measured from  
262 scRNA-seq data) that is positively correlated with increased accessibility of their motif, for Injury-  
263 like and nmSC Core SCs (examples of relevant TFs are shown in Figure S6B). Because of the  
264 correlation between motif accessibility and associated TF expression, these TFs may be most

265 critical to defining cell state. Indeed, we identified several enriched TF motifs with corresponding  
266 increased TF expression among Injury-like (*e.g.*, *BACH1*, *SMARCC1*, *FOSL1*, *FOSL2*, *RUNX2*)  
267 and nmSC Core (*e.g.*, *CTCF*, *NFYC*, *KLF7*) SCs (Figure 4H). Interestingly, many Injury-like TFs  
268 have been strongly implicated in the normal SC response to nerve injury<sup>45–48</sup>. For example, an  
269 increase in both *FOSL2* binding motifs and *FOSL2* gene expression have been found in repair  
270 SCs<sup>45</sup>, reminiscent of the repair-like expression profile found in Injury-like VS. In contrast, *CTCF*  
271 was found to be critical for SC differentiation into myelinating SCs, the most mature SC state,  
272 consistent with the decreased repair-like expression profile in nmSC Core VSs<sup>47</sup>.

273

#### 274 *Injury-like VS-SCs secrete ligands known to promote myeloid cell migration and proliferation*

275 We next sought to characterize the signaling pathways by which VS tumor cells might  
276 communicate with other cell populations in the VS TME in Injury-like and nmSC Core tumors.  
277 We first focused on tumor-wide patterns of intercellular communication. We inferred network-  
278 wide ligand-receptor interactions using CellChat<sup>49</sup> and found that Injury-like tumors had a higher  
279 total number of inferred intercellular interactions and overall higher imputed interaction strength,  
280 largely driven by stromal and SC interactions (Figure S6C).

281

282 Next, we sought to better understand the specific signaling pathways upregulated and  
283 downregulated in Injury-like VSs. Notably, *CCL*, *LIGHT*, *NECTIN*, *PERIOSTIN*, *HGF*, *PTN*, and  
284 *CSF* signaling pathways had stronger and more abundant interactions in Injury-like tumors (Figure  
285 5A). A relative increase in outgoing *CCL* signals was observed across all cell types in Injury-like  
286 tumors except for mast cells and B cells (Figure 5B), with endothelial cells being the primary  
287 receiver of these signals via *ACKR1* expression. *ACKR1* encodes the Duffy antigen receptor, which

288 mediates chemokine transcytosis and enhances leukocyte migration and may therefore promote  
289 immune cell recruitment in Injury-like VSs<sup>50</sup>. Interestingly, Injury-like fibroblasts and SCs had  
290 increased expression of *HGF* and its receptor, *MET*, respectively. Prior work has established *HGF*  
291 as a crucial activator of repair Schwann cells in peripheral nerve injury models, suggesting that  
292 this signaling may induce the VS-SC states seen in Injury-like VSs<sup>51</sup>. Lastly, *CSF* signaling  
293 distinctly arose from both myeSC and nmSC in Injury-like tumors, with myeloid cells and cycling  
294 cells receiving these signals. Both IL-34 and CSF1 are known chemotactic factors for circulating  
295 monocytes secreted by SCs, and previous work has shown that both IL-34 and CSF1 are expressed  
296 in VSs, with a weak correlation between tumor growth and CSF1 levels described<sup>52,53</sup>. Our results  
297 suggest that this signaling is increased in Injury-like tumors.

298  
299 Given the abundance of myeloid cells in Injury-like VS, we sought to further characterize VS-SC  
300 to myeloid signaling at the cell subtype level. We sought to identify secreted ligands that were 1)  
301 strongly expressed by VS-SC in the scRNA-seq data, 2) differentially expressed in tumors relative  
302 to healthy nerve controls in the bulk expression data, 3) and had cognate receptors expressed in  
303 the VS myeloid cells. Our search identified seven candidate ligands with 10 predicted receptors  
304 (Figure 5C). Of note, *IL34* was expressed by repair-like SCs and MHC II SCs, which also highly  
305 expressed *CSF1*, with the cognate receptor *CSF1R* most strongly expressed in migratory myeloid  
306 cells. We therefore hypothesized that VS-SCs promote myeloid cell migration and proliferation.  
307 To test this hypothesis, we applied conditioned media from a previously utilized cell line model  
308 of schwannoma (immortalized human Schwann cells; HSC) to human CD14<sup>+</sup> peripheral blood  
309 monocytes<sup>27</sup>. We found that conditioned media from the schwannoma line promoted the migration  
310 and proliferation of monocytes *in vitro*, suggesting that secreted VS-SC factors may influence both

311 processes (Figure 5D). Together these findings suggest that VS-SCs secrete ligands that recruit  
312 monocytes and drive their proliferation, potentially contributing to the progression of VS (see  
313 model in Figure 5E).

314

## 315 **DISCUSSION**

316 The fundamental factors driving VS tumor progression and unfavorable clinical outcomes remain  
317 poorly understood, and consequently, effective medical therapies to limit VS growth remain  
318 elusive. Our single-cell multi-omic analysis of sporadic VS represents an important step in  
319 understanding the *intra*- and *inter*-tumoral heterogeneity underlying their pathogenesis and  
320 progression. Among our key findings is an unexpected diversity within the SC compartment of  
321 these tumors. Consistent with prior reports, the majority of VS-SCs are characterized by loss of  
322 the myelinating phenotype<sup>38</sup>. Furthermore, using transcriptional signatures derived from the  
323 peripheral nerves of mice under steady state, post-injury, and developmental conditions, we found  
324 that VS-SCs most resemble SCs in the setting of peripheral nerve injury, with subpopulations of  
325 VS-SC adopting transcriptional states similar to repair-type SCs. Interestingly, we noted that, in  
326 select tumors, enrichment of repair-like VS-SCs correlated with VS-SCs that express the MHC  
327 class II antigen presentation machinery. Furthermore, this group of tumors also had  
328 disproportionately higher fractions of cells of myeloid lineage (*e.g.*, monocytes and macrophages)  
329 comprising the TME. In the setting of peripheral nerve injury, SCs are believed to be the initial  
330 recruiters of monocytes and macrophages, which then contribute to breakdown of myelin and  
331 recruitment of additional leukocytes<sup>54</sup>. Accordingly, our findings reveal that the TME of Injury-  
332 like VSs resembles the cellular microenvironment of a peripheral nerve in the initial days after  
333 injury.

334

335 In contrast to damaged peripheral nerves, where SCs proliferate along the trajectory of  
336 regenerating axons, we observed low proliferative capacity among VS-SCs in our data, which is  
337 consistent with the typical slow growth of these lesions<sup>55</sup>. Interestingly, we found that infiltrating  
338 immune cells expressed markers of cell cycle progression at a higher rate than VS-SC or VS  
339 stromal cells, which suggests that cues within the VS TME promote this immune cell turnover and  
340 renewal. Our findings are consistent with a prior immunohistochemical study of VS tumors with  
341 sudden growth, which found that tumor-associated macrophages (TAM) comprised 50-70% of all  
342 proliferating cells *in situ*<sup>56</sup>. Thus, our analysis extends on these findings and converges on the  
343 overarching principle that myeloid cell proliferation and infiltration may be key cell biological  
344 processes that underlie tumor growth.

345

346 In our deconvolution analysis of 175 tumors characterized by bulk expression sequencing, we  
347 found that Injury-like tumors were associated with larger tumor size. The variable presence of  
348 TAMs in the VS TME has been previously described, but their role in VS pathogenesis and their  
349 functional phenotypes have been poorly characterized<sup>52,56,57</sup>. For example, increased presence of  
350 macrophage markers on histology has been associated with tumor growth, poor post-operative  
351 facial nerve outcomes, and poor pre-operative hearing<sup>56,58,59</sup>. Other reports have suggested that an  
352 inflammatory dimension of VSs may contribute to adverse outcomes in these patients and have  
353 served as the basis for ongoing trials evaluating the potential of aspirin to mitigate sudden tumor  
354 growth<sup>60</sup>. Interestingly, among this broad cohort of patients, NF2-associated VS tumors were  
355 almost exclusively low in macrophage infiltrate. Why these lesions harbor fewer infiltrating  
356 immune cells remains an important question, as our cohort of patient samples characterized by

357 scRNA-seq did not include any syndromic NF2 patient tumors. Future work characterizing both  
358 sporadic and syndromic VS will help elucidate the differences in microenvironmental cues that  
359 promote myeloid cell recruitment in specific tumors.

360

361 Given that Injury-like VSs may be associated with worse patient outcomes, we sought to  
362 characterize the transcriptional regulation and cell-to-cell signaling of these tumors relative to  
363 nmSC Core VSs to identify potentially novel therapeutic targets. We found that nmSCs from  
364 Injury-like and nmSC Core tumors bear different epigenetic profiles. Furthermore, we identified  
365 several relevant TFs that not only have accessible motifs in both Injury-like and nmSC Core cells  
366 but also demonstrated increased gene expression of the relevant TF in the respective VS-SC groups  
367 (*e.g.*, *RUNX1*, *FOSL1*, *FOSL2*, *etc.*). Regarding cell-to-cell signaling, while there were pathways  
368 more highly expressed in Injury-like tumors (*e.g.*, *CCL*, *MIF*, *etc.*), CSF signaling appeared to be  
369 specific between VS-SC and myeloid cells. This signaling axis is seen in inflammatory  
370 neuropathies, and our results suggest its role may extend to VS tumor progression<sup>53,61</sup>.  
371 Experiments using an *in vitro* VS model and healthy donor CD14<sup>+</sup> monocytes further support the  
372 hypothesis that VS-SCs promote monocyte migration and proliferation. Taken together, our  
373 findings uncover potential pathophysiological mechanisms that may drive tumor growth and  
374 require major investigation, including future pre-clinical work to screen regulatory transcription  
375 factors and/or receptor-ligand pathways for their effects on tumor behavior.

376

377 There are several limitations of this study. Patients in our scRNA-seq cohort were limited to  
378 sporadic VS, and our findings pertaining to the TME composition and SC states may not be  
379 generalizable to patients with schwannoma of other sites or patients with syndromic NF2-

380 associated tumors. In addition, our patient cohort was restricted to patients who underwent surgery,  
381 and thus we were unable to characterize small, asymptomatic tumors since such lesions are  
382 routinely observed radiographically or treated with stereotactic radiosurgery.

383

384 In summary, our work provides important insights into VS biology as well as a detailed  
385 transcriptomic and epigenetic single cell atlas of the Schwann, stromal, and immune cells that  
386 comprise the VS TME. Our analysis suggests that VSs can be categorized based on nerve Injury-  
387 like VS-SC gene expression programs and associated myeloid cell infiltrate. Furthermore, Injury-  
388 like tumors appear to be associated with larger tumor size, and chemokines secreted by VS-SCs  
389 may recruit circulating monocytes. These findings uncover previously undescribed mechanisms  
390 of pathogenesis and tumor progression in VS and suggest novel biomarkers and therapeutic targets  
391 to be explored in future studies.

## 392 MATERIALS AND METHODS

### 393 *Human tumor specimens*

394 Patient samples used for scRNA-seq and scATAC-seq were all derived from patients treated at  
395 Barnes-Jewish Hospital (St. Louis, MO, USA). All patients provided written informed consent to  
396 participate in the study following Institutional Review Board Approval (Protocol #201111001 ,  
397 #201103136, and #201409046). Patient characteristics are summarized in Figure 1B and Table S1.  
398 Tumor samples used for bulk RNA-seq analysis consisted of paraffin-embedded tissue from 22  
399 VS patients treated at Baylor College of Medicine (BCM; Houston, TX, USA) (Table S2). All  
400 patients provided written informed consent, and tumor tissues were collected under an institutional  
401 review board (IRB)-approved protocol at BCM by the Human Tissue Acquisition and Pathology  
402 Core (Protocol H-14435). All schwannomas were reviewed by a board-certified neuropathologist  
403 according the 2016 WHO guidelines. Raw data from previously published studies were obtained  
404 as follows: RNA-seq and expression microarray data that were publicly available were  
405 downloaded (GSE39645<sup>30</sup>, GSE141801<sup>29</sup>, GSE108524<sup>31</sup>, EGA00001001886<sup>27</sup>); data from *Aaron*  
406 *et al*<sup>44</sup> were kindly shared upon request. Clinical annotations accompanying the sample data from  
407 *Torres-Marin et al*<sup>30</sup> were also kindly shared upon request.

408

### 409 *Fresh tumor dissociation*

410 Samples processed for scRNA-seq and scATAC-seq were collected at the time of surgical  
411 resection and immediately processed. Tumor samples were minced and dissociated using the  
412 Human Tumor Dissociation Kit (Miltenyi Biotech, Bergisch Gladbach, Germany) per  
413 manufacturer guidelines. The dissociated cell suspensions were then passed through 40µm filter,  
414 pelleted through centrifugation, and resuspended in AutoMACS Rinsing Solution with 0.5%



415 bovine serum albumin (BSA; Miltenyi Biotech). Red blood cell lysis was performed on all samples  
416 with Gibco ACK Lysing Buffer (ThermoFisher Scientific, Waltham Massachusetts, US) and was  
417 followed by debris removal via density gradient when necessary (Debris Removal Solution,  
418 Miltenyi Biotech, Bergisch Gladbach, Germany). Cell viability was confirmed to be > 80% using  
419 0.4% Trypan Blue staining (Invitrogen, catalog #T10282) and manual counting with a  
420 hemocytometer. For samples in which scATAC-seq was additionally performed, nuclei isolation  
421 was performed according to the 10X Demonstrated Protocol “Nuclei Isolation for Single Cell  
422 ATAC Sequencing” (Rev D).

423

#### 424 *Tumor nuclei isolation for scRNA-seq*

425 Fresh frozen samples used for scRNA-seq were collected at the time of surgical resection and  
426 frozen in OCT compound embedding media (Tissue-Tek, Torrance, California) on a pre-chilled  
427 aluminum block resting on dry ice, and stored at -80 °C. Tissue scrolls were cut at 30 µm using a  
428 Cryostat (50-100 scrolls were cut per sample, depending on the tissue size) and maintained at -  
429 80°C until the time of nuclei isolation. Lysis buffer (consisting of Tris-HCl, NaCl, MgCl<sub>2</sub>, Nonidet  
430 P40 Substitute, 0.1M DTT, RNase inhibitor, and nuclease free water) was added to the tissue  
431 scrolls, which were homogenized using a Pellet Pestle while on ice. Additional lysis buffer was  
432 then added, and the mixture was incubated on ice for 5 minutes. The suspension was passed  
433 through a 70 µm strainer and centrifuged before being washed with a solution of PBS with 1%  
434 BSA and 1U/µl Rnase inhibitor, incubated on ice for 5 minutes, centrifuged, and resuspended in  
435 1ml PBS with 1% BSA and 1 U/µl Rnase inhibitor. The nuclei were then labeled with DRAQ5  
436 (Thermo Scientific, catalog #62251) and selected using FACS sorting performed by the Siteman  
437 Flow Cytometry Core before being carried forward for single nuclei library creation.

438

439 *scRNA-seq library preparation and sequencing*

440 Single cell and single nuclei suspensions were processed using 10X Chromium Next GEM Single  
441 Cell 3' Reagent Kits v3.1 (10X Genomics, Pleasanton, CA) per manufacturer protocols. Briefly,  
442 cells were added onto the 10X Next GEM Chip G to form Gel Bead-in-Emulsions (GEMs) in the  
443 Chromium instrument followed by cell lysis, barcoding, cDNA amplification, fragmentation,  
444 adaptor ligation, and sample indexed library amplification. Completed gene expression libraries  
445 were sequenced on Illumina NovaSeq S4 flow cells at a target depth of 50,000 read pairs per cell.  
446 Single cell RNA and single nucleus RNA sequencing reads were aligned to human reference  
447 GRCh38 v2020-A from 10x Genomics using the 10x Genomics Cellranger-4.0.0 and Cellranger-  
448 6.0.0 (include-introns flag set to true) pipelines, respectively. Sequencing quality control metrics  
449 are listed in Table S3.

450

451 *snATAC-seq library preparation and sequencing*

452 snATAC-seq libraries were prepared using the 10X Chromium Next GEM Single Cell ATAC  
453 Reagent Kits v1.1 (10X Genomics) according to the manufacturer's protocols. In brief, nuclei were  
454 incubated in a transposition mixture including a transposase to fragment open chromatin regions.  
455 Transposed nuclei were then loaded onto the 10X Next GEM Chip H to generate GEMs, followed  
456 by sample indexed library amplification. snATAC-seq libraries were sequenced in Illumina  
457 NovaSeq S1 flow cells at a target depth of 250M total read pairs per sample. The resulting FASTQ  
458 files were aligned to GRCh38 v2020-A using the 10x Genomics Cellranger ATAC-1.2.0 count  
459 function.

460

461 *scRNA-seq/snRNA-seq data preprocessing*

462 Ambient RNA removal and empty droplet calling was performed using CellBender<sup>62</sup>. Samples  
463 were processed individually and iteratively with adjustment of the parameters to achieve optimal  
464 learning curves and barcode rank plots for each sample. Final parameters used are listed in Table  
465 S4. CellBender outputs consisting of counts matrices adjusted for ambient RNA and excluding  
466 empty droplets were then preprocessed for doublet calling using Scrublet<sup>63</sup> and ScanPy<sup>64</sup> as  
467 follows: a) Cells with < 500 genes were excluded; b) Genes not expressed in at least 0.1% of cells  
468 were excluded; c) Percent mitochondrial counts was computed for each cell, Leiden clustering  
469 performed, and cells with percent mitochondrial counts greater than 2 standard deviations from  
470 their respective cluster mean percent mitochondrial counts were removed. Samples were then  
471 processed individually and iteratively, varying the n-neighbors and expected\_doublet\_rate and  
472 choosing the values for each that resulted in a bimodal simulated doublet histogram with a bimodal  
473 curve fit  $R > 0.85$  and the fraction of the second Gaussian less than or equal to the 99th percentile  
474 of the first.

475

476 The filtered gene expression matrix was then processed and analyzed by using Seurat v4.0.0<sup>65</sup>. To  
477 filter low-quality cells, we first removed cells for which less than 1000 genes were detected or  
478 cells that contained greater than 20% of genes from the mitochondrial genome. We included genes  
479 with  $\geq 5$  UMI in at least 10 cells for downstream analysis.

480

481 *scATAC-seq data preprocessing and clustering analysis*

482 scATAC-seq preprocessing and analysis was performed using ArchR 1.0.1 as detailed in the  
483 ArchR manual<sup>66</sup>. Briefly, nuclei with a TSS < 10 and with < 1000 fragments were excluded.

484 Doublets were identified and removed using the ArchR `addDoubletScores` and `filterDoublets`  
485 functions with `filterRatio = 1.5`, `DoubletScore ≤ 50`. Dimensional reduction was performed using  
486 the `addIterativeLSI` function and default ArchR values of `sampleCells = 10000`, `n.start = 10` and  
487 `varFeatures = 15000`. Next, the `addClusters` function was used for cell clustering and the  
488 `addGeneIntegrationMatrix` function was used to perform unconstrained cross-platform linkage of  
489 scATAC-seq cells with snATAC-seq cells from the scRNA-seq atlas without single nucleus  
490 samples. scATAC-seq clusters were then labeled with a cell identity by creating a confusion matrix  
491 between scATAC-seq clusters and cell identities from linked scRNA-seq cells and assigning each  
492 cluster the identity of the greatest proportion of linked scRNA-seq cells in that cluster (Figure  
493 S2E).

494

#### 495 *Multiple sample integration with reciprocal principal component analysis*

496 To overcome batch effects related to freshly dissociated samples and nuclei isolated from fresh  
497 frozen samples, Seurat's reciprocal principal component analysis (RPCA) was used to integrate  
498 the scRNA-seq datasets<sup>67</sup>. In brief, a SeuratObject was generated for each sample. Each sample  
499 was then normalized using Seurat's 'NormalizeData' function. 'FindVariableFeatures' was used  
500 to identify 3000 variable features in each sample. Integration features were selected using  
501 'SelectIntegrationFeatures' (`nfeatures = 3000`). 'FindIntegrationAnchors' was used to perform  
502 RPCA integration (by sample) in Seurat. The data was integrated using 'IntegrateData' with k-  
503 nearest neighbors (`k.weight`) set to 50; integrated values were returned for all genes in the  
504 SeuratObject. The integrated RPCA object was further scaled using 'ScaleData' function and was  
505 projected on the UMAP with 30 principal components. Graph-based clustering was performed  
506 (`resolution = 0.5`) on the integrated object. Differentially expressed genes were calculated for the

507 clusters of “integrated Assay” on the “RNA Assay” using the ‘FindAllMarkers’ function with  
508 only.pos = T (*i.e.*, only for upregulated genes). Only significant ( $p_{\text{adj}} \leq 0.05$ ) DEGs were used in  
509 further analysis.

510

#### 511 *Gene signature scoring and cell type assignments*

512 To corroborate our cell type labels, we used the top 30 differentially expressed genes (DEGs) from  
513 each peripheral nerve cell-type cluster as defined by the original authors from each study to score  
514 each cell in our VS dataset. The mean score of each signature was calculated for each VS TME  
515 cluster using the Seurat AddModuleScore function (Figure S1B). To assess the consistency of  
516 peripheral nerve cell-type scores across studies, we assigned meta-signatures for similarly labeled  
517 cell clusters within and across the mouse nerve studies (*e.g.*, “Schwann cells” from Carr et al and  
518 “Nm-SCs” from Yim et al were assigned the meta-label “Schwann”) and computed the mean score  
519 of all cluster scores per meta-signatures (Figure 1F).

520

#### 521 *Inferred copy number alteration analysis*

522 CONICSmatrix (0.0.0.1) was used for single cell CNV analysis<sup>28</sup>. Putative normal and tumor cells  
523 were selected based on initial cell type assignment. All the Schwann cells (nmSC and myeSC)  
524 were assumed to be tumor cells and the rest of the cells in the immune and stromal component  
525 were assumed to be normal cells for input in CONICSmatrix. Relative count normalization was  
526 performed in Seurat (4.0.0) with scale factor of  $10^5$  and  $\log_2(\text{CPM}/10+1)$  transformation was  
527 performed on the resulting matrix. A normalization factor was calculated for each column in the  
528 expression matrix using ‘calcNormFactors’ function in CONICSmatrix. A two-component Gaussian  
529 Mixture Model was estimated for the  $\log_2(\text{CPM}/10+1)$  expression matrix. Fit-data plots and z-

530 score heatmaps were generated using ‘plotAll’ function in CONICSmatrix. The fit-data plots were  
531 assessed manually for each sample and CNV alteration for its validity. Only the CNVs which  
532 showed clear amplification/deletion were chosen for each sample based on the fit-data plots, BIC  
533 score ( $\geq 50$ ) and z-score heatmaps. For each significant CNV alteration, specific clusters that  
534 showed the alteration were selected from the z-score heatmaps. For each CNV alteration, a Fisher  
535 exact test was used to confirm enrichment of that CNV alteration in the Schwann cells in  
536 comparison to other cells.

537

#### 538 *Comparison of nmSC and myeSC gene signatures of VS tumor samples to normal nerve*

539 Microarray datasets (GSE141801, GSE108524 and GSE39645) were downloaded using  
540 GEOquery’s (v2.58.0) ‘getGEO’ function. Biobase’s (v2.50.0) ‘exprs’ function was used to extract  
541 the microarray eSets (expression data from sets) object and log2 normalization was performed.  
542 The design matrix for a particular microarray dataset was constructed to compare the type of tissue  
543 (*i.e.*, ‘Normal-nerve’ vs. ‘schwannoma’) using the ‘model.matrix’ function from stats package  
544 (v4.0.3). The eSet object was weighted based on the design matrix and a linear model was fit to  
545 the data using limma’s (v3.46.0) ‘arrayWeights’ and ‘lmFit’ functions respectively.  
546 ‘makeContrasts’ function from limma was used to extract contrasts between ‘control/normal-  
547 nerve’ and ‘tumor/schwannoma’ samples. Empirical Bayes statistics were used for differential  
548 expression analysis between normal and tumor samples using limma’s eBays function. The  
549 resulting moderated t-statistics were classified into ‘up’, ‘down’ or ‘no change’ using limma’s  
550 ‘decideTests’ function. The scaled eSet matrix was further visualized for top 50 differentially  
551 expressed single cell markers from both ‘nmSC’ and ‘myeSC’ cells. ComplexHeatmap (v2.11.1)  
552 was used to annotate differential expression and normal-tumor groupings.

553

554 *VS-SC, stromal, and NK/T cell analysis*

555 Clusters were extracted from the full scRNA-seq dataset and were renormalized and reclustered  
556 using Seurat. The subclusters were corrected/integrated using RPCA, as described above. Samples  
557 with fewer than 40 cells for a given cell type were excluded. Clusters that were presumed residual  
558 doublets (*e.g.*, cells expressing *PTPRC* in the Schwann cell subcluster) or low quality cells (*i.e.*,  
559 high ribosomal RNA content) were manually removed and the remaining data were reprocessed,  
560 as above. Due to batch effects that were apparent at the subcluster level between the freshly  
561 dissociated cells and isolated nuclei from frozen tissue, we performed the primary subtype analysis  
562 on the freshly dissociated samples, with the fresh frozen samples serving as a validation dataset  
563 (Figure S3D). Gene Ontology Biologic Process Enrichment analysis was performed using the  
564 ‘compareCluster’ function from ClusterProfiler (v3.18.1), with the top 25 DEGs of each celltype  
565 subclassification, ranked by average Log2FC. VS-SC were scored using the mouse peripheral  
566 nerve Schwann cell-specific DEGs as defined by the original study authors’ labels with Seurat’s  
567 ‘AddModuleScore’ function.

568

569 *Cycling cell analysis*

570 Cells from the scRNA-seq data that clustered by expression of cell cycle markers (“Cycling Cells”,  
571 Figure 1C) were subset from the overall dataset and scored by top 30 DEGs of all other broad cell  
572 types comprising the VS TME with Seurat’s AddModuleScore function. Cell-type frequencies  
573 were scaled to reflect cell numbers of the overall dataset. Chi-square testing was used to compare  
574 scaled expected cell-type frequencies with observed cell type frequencies across the entire dataset.

575 Cell cycle phase assignments were made using Seurat's CellCycleScoring function with Seurat's  
576 included S-phase and G2M phase markers.

577

578 FFPE VS specimens from included patients in scRNA-seq analysis were obtained and used to  
579 generate a tissue microarray (TMA). The TMA was designed to include four separate 2mm cores  
580 from each FFPE block used for pathologic diagnosis at the time of surgery. Tissue arrays were cut  
581 into sections (5 $\mu$ m) on positively charged slides. For immunohistochemistry, sections were stained  
582 using a Bond RXm autostainer (Leica). Briefly, slides were baked at 65°C for 4hrs and automated  
583 software performed dewaxing, rehydration, antigen retrieval, blocking, primary antibody  
584 incubation, post primary antibody incubation, detection (DAB) and (RED), and counterstaining  
585 using Bond reagents (Leica). Samples were then removed from the machine, dehydrated through  
586 ethanols and xylenes, mounted and cover-slipped. Antibodies for Ki67 (Abcam ab16667) and  
587 CD45 (Agilent M0701) were diluted 1:200 in Antibody diluent (Leica). Brightfield images of 3-4  
588 high-power field regions (40x) per patient were obtained using a Nikon ECLIPSE Ti2 inverted  
589 microscope. Quantification of cell type marker scoring was performed in a semi-quantitative  
590 fashion using QuPath-0.3.1. The 'Positive Cell Detection' function was used to identify Ki67+ and  
591 Ki67- cells using the following parameters: Nucleus Parameters (Requested pixel size 0.5  $\mu$ m,  
592 Background radius 8  $\mu$ m, Median filter radius 0  $\mu$ m, Sigma 1.5  $\mu$ m, Minimum area 10  $\mu$ m<sup>2</sup>,  
593 Maximum area 40  $\mu$ m<sup>2</sup>), Intensity Parameters (Threshold 0.001, Max background intensity 2),  
594 Cell parameters (Cell expansion 0  $\mu$ m), Intensity threshold parameters (Score compartment  
595 "Nucleus: DAB OD Mean", Single Threshold 1.4976). CD45+ cells were manually annotated.  
596 Statistical analysis was performed using a two-sided student's t-test to compare the means of  
597 individual sample means with a significance threshold of  $p < 0.05$ .



598

599 *Classification of scRNA-seq VS-SC as Injury-like and Core*

600 VS-SC obtained via scRNA-seq were subset and, using the top 50 DEGs of each VS-SC subtype  
601 based on average log<sub>2</sub>FC, scored for each of the identified VS-SC subtypes with Seurat's  
602 'AddModuleScore' function. Individual cell scores were averaged across all cells of a given VS-  
603 SC subtype across all samples. Sample scores were scaled and samples were hierarchically  
604 clustered based on their scaled scores in an unsupervised manner based on Euclidean distance. The  
605 highest branchpoint of the dendrogram was used to divide the cohort into two groups, which we  
606 ultimately labeled Injury-like and nmSC Core. Mean scores for each VS-SC subtype were  
607 compared between Injury-like and Core using a student's t-test with correction for multiple  
608 hypothesis testing using the BH method with an FDR or 20%.

609

610 *Myeloid cell analysis*

611 To identify cell states in Myeloid subcluster, non-negative matrix factorization was applied to each  
612 sample to identify meta-programs, as previously described<sup>40</sup>. The data was first normalized using  
613 CPM normalization and was transformed with log<sub>2</sub>(CPM+1) transformation. The CPM expression  
614 was then centered across each gene by subtracting the average expression of each gene across all  
615 cells. All negative values were then transformed to zero. The NMF was computed on the relative  
616 expression values with number of factors (K) ranging from 2-9. For each value of K, the top 100  
617 genes (with respect to NMF score) were used to define an expression program. For each sample,  
618 we selected "robust" expression programs, which were defined as having an overlap of at least  
619 70% (intra\_min = 70) with a program obtained from the same sample using a different value of K.  
620 We removed "redundant" programs, which were defined as overlapping another program from the

621 same sample by more than 10% (intra\_max = 10). The programs were filtered based on their  
622 similarity to programs of other samples (inter\_filter = True). Only those programs which had an  
623 overlap of at least 20% between programs of two samples were considered (inter\_min = 20). To  
624 identify MPs across samples, we compared expression programs by hierarchical clustering, using  
625 100 minus the number of overlapping genes as a distance metric. Eight clusters (*i.e.*, MPs) were  
626 defined by manual inspection of the hierarchical clustering results. Final MP signatures only  
627 included those genes that occurred in 50% of the constitutive programs per cluster. Individual  
628 myeloid cells were scored according to these MP signatures using Seurat's AddModuleScore  
629 function, and the cells were assigned to the metaprogram for which they scored most highly. The  
630 functional annotation of these metaprograms was done using (1) GO term enrichment (data not  
631 shown) and (2) overlap of these metaprogram genes in existing myeloid subtype markers.

632

### 633 *Bulk RNA sequencing, alignment, and preprocessing*

634 Bulk RNA-sequencing of VS was performed by Tempus, Inc. (Chicago, IL, USA), which entailed  
635 sending tumor samples along with saliva for processing according to their protocol<sup>68</sup>. RNA-seq  
636 reads were then aligned to the GRCh38 assembly with STAR version 2.7.2b (Parameters:--  
637 genomeDir Ensembl\_GRCh38.fa --genomeLoad NoSharedMemory --outSAMmapqUnique 60 --  
638 outSAMunmapped Within KeepPairs --outFilterIntronMotifs RemoveNoncanonicalUnannotated  
639 --outSAMstrandField intronMotif --runThreadN 8 --outStd BAM\_Unsorted --outSAMtype BAM  
640 Unsorted --alignTranscriptsPerReadNmax 100000 --outFilterMismatchNoverLmax 0.1 --  
641 sjdbGTFfile Ensembl\_GRCh38\_genes.gtf > genome\_accepted\_hits.bam). Gene counts were  
642 derived from the number of uniquely aligned unambiguous reads by Picard version 2.6.0.  
643 Sequencing performance was assessed for the total number of aligned reads, total number of

644 uniquely aligned reads, and features detected. All gene counts were then imported into the R  
645 (3.2.3). Bioconductor (3.2) package EdgeR and TMM normalization size factors were calculated  
646 to adjust for samples for differences in library size. The previously published RNA-seq datasets  
647 were aligned and processed in an identical manner.

648

#### 649 *Deconvolution analysis of bulk expression data*

650 CIBERSORTx was used to build a custom signature reference from the scRNA-seq dataset and  
651 impute cell fractions from each of the RNA-seq and microarray expression datasets on a one-by-  
652 one basis to avoid confounding batch effects<sup>43</sup>. Default CIBERSORTx parameters for generation  
653 of a scRNA-seq reference matrix were used, except for fraction of cells expressing a given gene,  
654 which was set to 0 to avoid overly aggressive filtration of genes for generation of the signature  
655 matrix given the sparse nature of 10X Chromium derived data. S-mode was used for batch  
656 correction during imputation of cell fractions from mixture (*e.g.*, bulk sequencing) data.  
657 Unsupervised hierarchical clustering based on Euclidean distance was performed across all  
658 samples for each individual bulk expression dataset, and cohorts were grouped into “Injury-like”  
659 and “nmSC Core” Cohorts based on the first dendrogram branchpoint. Samples with available  
660 clinical data were split by Injury-like/nmSC Core groups and outcomes of interest were compared  
661 across these two groups using a Fisher’s exact test.

662

#### 663 *scATAC-seq VS-SC analysis*

664 All VS-SC from the scATAC-seq dataset were subset and assigned an identity of Injury-like or  
665 nmSC Core based on the classification of the tumor from which they arose by scRNA-seq analysis.  
666 Myelinating SC arose predominantly (> 90%) from a single nmSC Core sample and were therefore

667 excluded from further analysis. To reduce biasing by outlier cells when comparing the two groups,  
668 cells in the top and bottom 5<sup>th</sup> percentile for number of fragments, TSS enrichment, and reads in  
669 TSS were excluded from further analysis. Approximately 750 cells remained in each of the Injury-  
670 like and nmSC Core groups after filtration and were analyzed further. Pseudo-bulk replicates were  
671 created using the ArchR `addGroupCoverages` function with `minReplicates = 3`, `minCells = 100`,  
672 `maxCells = 500`, and `sampleRatio = 0`, and peak calling was performed using MACS2 (2.2.7.1)  
673 (<https://pypi.org/project/MACS2/>) as detailed in the ArchR manual. Per-cell transcription factor  
674 motif deviations were added using the `addDeviationsMatrix` function and motifs annotated using  
675 the CIS-BP annotations built in to ArchR. Positive transcription factor regulators were identified  
676 using the `correlateMatrices` function and pairing either the gene score matrix (containing  
677 chromosomal accessibility data) or the gene integration matrix (containing gene expression data  
678 from linked scRNA-seq cells) with the transcription factor deviations matrix (see ArchR manual  
679 for details). Relevant TFs were defined based on default ArchR parameters (correlation > 0.5,  
680 adjusted  $p < 0.01$  and max delta > 75<sup>th</sup> percentile of all max deltas).

681

### 682 *Ligand-receptor analysis*

683 Cell-cell communication networks were inferred using the standard CellChat inference and  
684 analysis of cell-cell communication workflow CellChat (1.5.0)<sup>49</sup>. In brief, the scRNA-seq was  
685 divided into two cohorts (Injury-like and Core), each individual dataset then underwent library  
686 size normalization followed by log transformation using *Seurat's* 'NormalizeData' function. The  
687 CellChatDB curated database of ligand-receptor interactions was used, over-expressed  
688 ligand/receptor genes were identified within each broad cell group (*e.g.*, nmSC, fibroblasts, *etc.*)  
689 using the 'identifyOverExpressedGenes' function, and then each ligand-receptor interaction were

690 identified using the ‘identifyOverExpressedInteractions’ function. Communication probabilities  
691 were calculated for both ligand-receptor pairs and pathway level interactions using the  
692 ‘computeCommunProb’ and ‘computeCommunProbPathway’ functions, respectively. The cell-  
693 cell communication networks were then summarized using the ‘aggregateNet’ function to  
694 determine the number of unique links and overall communication probability. The two  
695 communication networks (*i.e.*, Injury-like VS and nmSC Core VS) were compared following the  
696 CellChat manual for comparison analysis of multiple datasets. Functions were performed with  
697 default parameters unless otherwise stated. Total interactions and interaction strength were  
698 determined using the ‘compareInteractions’ function and visualized on a cell-type level as a  
699 heatmap using the newVisual\_heatmap’ function. Joint manifold learning and classification of the  
700 inferred communication networks based on their functional similarity was performed using the  
701 ‘computeNetSimilarityPairwise’, ‘netEmbedding’, and ‘netClustering’ functions. Conserved and  
702 context-specific signaling pathways for each communication network were compared using the  
703 ‘rankNet’ function and a Wilcoxon rank-sum testing was performed with  $p$  cutoff of 0.05. Cell-  
704 type population level signaling was visualized in a heatmap using the  
705 ‘netAnalysis\_signalingRole\_heatmap’ function for those pathways that were most specific to  
706 Injury-like tumors (Figure 5A).

707  
708 Specific interactions between VS-SC and myeloid cells were determined in the following manner.  
709 First, we used an extensive, previously described ligand-receptor database to identify potential  
710 signaling pairs (*NicheNet*)<sup>69</sup>. We identified ligands expressed in the VS-SC populations with an  
711 average Log2FC of 0.5 and expression in at least 5% of VS-SC and with similarly expressed  
712 cognate receptors in the myeloid cells. This list was further refined by only including ligand and

713 associated receptor genes that were differentially expressed by tumors relative to normal nerve  
714 controls in the expression microarray datasets, as described above. Lastly, the resulting list was  
715 filtered to only include those ligands that were known to be secreted molecules by review of the  
716 existing literature.

717

#### 718 *Cell lines*

719 HSC cells were generously provided by Dr. Gelareh Zadeh and colleagues. They were cultured in  
720 DMEM (ThermoFisher Scientific) supplemented with 10% fetal bovine serum (FBS) (Peak  
721 Serum, Fort Collins, CO) 1X penicillin-streptomycin (PSG) (ThermoFisher Scientific), and  
722 supplemented with 2  $\mu$ L forskolin (Sigma-Aldrich).

723

#### 724 *CD14<sup>+</sup> monocyte isolation*

725 Peripheral blood mononuclear cells (PBMC) were obtained from leukocyte reduction system cones  
726 that are classified as non-human research under the Washington University Human Research  
727 Protection Office. PBMC were isolated using SepMate tubes (StemCell Technologies) and Ficoll-  
728 Paque density gradient medium (Fisher Scientific). CD14<sup>+</sup> cells were positively selected using  
729 anti-CD14-conjugated magnetic microbeads (Miltenyi Biotec).

730

#### 731 *Migration assay with conditioned media*

732 Conditioned media (CM) was obtained as follows: HSC cells were plated at a density of 500,000  
733 cells/10cm tissue culture plate in their growth media containing 2.5% FBS. CM was collected at  
734 72 hours after plating, passed through 0.45  $\mu$ M PES syringe filter (MidSci), and used fresh. Base  
735 media (BM) served as a negative control and consisted of growth media for each respective line

736 with 2.5% FBS that was placed in an empty tissue culture plate in parallel to the CM plates,  
737 collected and filtered at 72 hours, identically as the CM. 500  $\mu$ L of CM or BM were placed into  
738 wells of a 24-well tissue culture plate. Cell culture inserts (8  $\mu$ m; Corning) were placed into each  
739 well and CD14<sup>+</sup> cells were plated above the inserts at a density of  $1 \times 10^6$  cells in 250  $\mu$ L serum-  
740 free RPMI 1640 media. Plates were incubated at 37° C for 24 hours. Quantification was performed  
741 by manual cell counting of the media in the bottom wells using a hemocytometer. Each condition  
742 was performed in triplicate, and the experiment was repeated three times to ensure biologic  
743 validity.

744

#### 745 *Cell proliferation with conditioned media*

746 CellTitre-Glo (CTG) proliferation assays (Promega) were completed according to manufacturer  
747 protocols. Briefly, 1000 CD14<sup>+</sup> monocytes were seeded per well in a 96 well plate in 100 $\mu$ L of  
748 HSC CM or HSC BM in technical replicates of 5. Cells were lysed on day 0 (one hour after seeding  
749 of cells) and day 2 by addition of the CTG reagent followed by measurement of luminescence  
750 using the Biotek Cytation 5 (BioTek, Winooski, VT). Luminescence values were adjusted based  
751 on 2 $\mu$ M Adenosine triphosphate (ATP) luminescence measured on the same plate for each day  
752 and background luminescence was removed. CM and BM were prepared, as above, except that  
753 media contained 10% FBS. The experiment was repeated three times to ensure biologic validity.

## REFERENCES

1. Carlson, M. L. & Link, M. J. Vestibular Schwannomas. *N Engl J Med* **384**, 1335–1348 (2021).
2. Starnoni, D. *et al.* Systematic review and meta-analysis of the technique of subtotal resection and stereotactic radiosurgery for large vestibular schwannomas: a “nerve-centered” approach. *Neurosurgical Focus* **44**, E4 (2018).
3. Yang, I. *et al.* A comprehensive analysis of hearing preservation after radiosurgery for vestibular schwannoma: Clinical article. *JNS* **112**, 851–859 (2010).
4. Coughlin, A. R., Willman, T. J. & Gubbels, S. P. Systematic Review of Hearing Preservation After Radiotherapy for Vestibular Schwannoma. *Otology & Neurotology* **39**, 273–283 (2018).
5. Ahsan, S. F., Huq, F., Seidman, M. & Taylor, A. Long-term Hearing Preservation After Resection of Vestibular Schwannoma: A Systematic Review and Meta-analysis. *Otology & Neurotology* **38**, 1505–1511 (2017).
6. Marinelli, J. P., Grossardt, B. R., Lohse, C. M. & Carlson, M. L. Prevalence of Sporadic Vestibular Schwannoma: Reconciling Temporal Bone, Radiologic, and Population-based Studies. *Otology & Neurotology* **40**, 384–390 (2019).
7. Ahronowitz, I. *et al.* Mutational spectrum of the *NF2* gene: a meta-analysis of 12 years of research and diagnostic laboratory findings. *Hum. Mutat.* **28**, 1–12 (2007).
8. Carlson, M. L. *et al.* Next Generation Sequencing of Sporadic Vestibular Schwannoma: Necessity of Biallelic *NF2* Inactivation and Implications of Accessory Non-*NF2* Variants. *Otology & Neurotology* **39**, e860–e871 (2018).
9. Petrilli, A. M. & Fernández-Valle, C. Role of Merlin/*NF2* inactivation in tumor biology. *Oncogene* **35**, 537–548 (2016).
10. Neff, B. A. *et al.* Inhibition of MEK pathway in vestibular schwannoma cell culture. *The Laryngoscope* **122**, 2269–2278 (2012).
11. Giovannini, M. *et al.* mTORC1 inhibition delays growth of neurofibromatosis type 2 schwannoma. *Neuro-Oncology* **16**, 493–504 (2014).



12. Kaempchen, K. Upregulation of the Rac1/JNK signaling pathway in primary human schwannoma cells. *Human Molecular Genetics* **12**, 1211–1221 (2003).
13. Blair, K. J. *et al.* EGF and bFGF Promote Invasion That Is Modulated by PI3/Akt Kinase and Erk in Vestibular Schwannoma: *Otology & Neurotology* **32**, 308–314 (2011).
14. Zhou, L. *et al.* Merlin-Deficient Human Tumors Show Loss of Contact Inhibition and Activation of Wnt/ $\beta$ -Catenin Signaling Linked to the PDGFR/Src and Rac/PAK Pathways. *Neoplasia* **13**, 1101-IN2 (2011).
15. Fuse, M. A. *et al.* Preclinical assessment of MEK1/2 inhibitors for neurofibromatosis type 2-associated schwannomas reveals differences in efficacy and drug resistance development. *Neuro-Oncology* **21**, 486–497 (2019).
16. Goutagny, S. *et al.* Phase II study of mTORC1 inhibition by everolimus in neurofibromatosis type 2 patients with growing vestibular schwannomas. *J Neurooncol* **122**, 313–320 (2015).
17. Karajannis, M. A. *et al.* Phase II study of everolimus in children and adults with neurofibromatosis type 2 and progressive vestibular schwannomas. *Neuro-Oncology* **16**, 292–297 (2014).
18. Plotkin, S. R. *et al.* Multicenter, Prospective, Phase II and Biomarker Study of High-Dose Bevacizumab as Induction Therapy in Patients With Neurofibromatosis Type 2 and Progressive Vestibular Schwannoma. *JCO* **37**, 3446–3454 (2019).
19. Qi, Z., Barrett, T., Parikh, A. S., Tirosh, I. & Puram, S. V. Single-cell sequencing and its applications in head and neck cancer. *Oral Oncology* **99**, 104441 (2019).
20. Buenrostro, J. D. *et al.* Single-cell chromatin accessibility reveals principles of regulatory variation. *Nature* **523**, 486–490 (2015).
21. Yim, A. K. Y. *et al.* Disentangling glial diversity in peripheral nerves at single-nuclei resolution. *Nat Neurosci* **25**, 238–251 (2022).
22. Hung, G. *et al.* Immunohistochemistry study of human vestibular nerve schwannoma differentiation. *Glia* **38**, 363–370 (2002).

23. Carr, M. J. *et al.* Mesenchymal Precursor Cells in Adult Nerves Contribute to Mammalian Tissue Repair and Regeneration. *Cell Stem Cell* **24**, 240-256.e9 (2019).
24. Kalinski, A. L. *et al.* Analysis of the immune response to sciatic nerve injury identifies efferocytosis as a key mechanism of nerve debridement. *eLife* **9**, e60223 (2020).
25. Wolbert, J. *et al.* Redefining the heterogeneity of peripheral nerve cells in health and autoimmunity. *Proc. Natl. Acad. Sci. U.S.A.* **117**, 9466–9476 (2020).
26. Gerber, D. *et al.* Transcriptional profiling of mouse peripheral nerves to the single-cell level to build a sciatic nerve ATlas (SNAT). *eLife* **10**, e58591 (2021).
27. Agnihotri, S. *et al.* The genomic landscape of schwannoma. *Nat Genet* **48**, 1339–1348 (2016).
28. Müller, S., Cho, A., Liu, S. J., Lim, D. A. & Diaz, A. CONICS integrates scRNA-seq with DNA sequencing to map gene expression to tumor sub-clones. *Bioinformatics* **34**, 3217–3219 (2018).
29. Gugel, I. *et al.* Contribution of mTOR and PTEN to Radioresistance in Sporadic and NF2-Associated Vestibular Schwannomas: A Microarray and Pathway Analysis. *Cancers* **12**, 177 (2020).
30. Torres-Martin, M. *et al.* Microarray analysis of gene expression in vestibular schwannomas reveals SPP1/MET signaling pathway and androgen receptor deregulation. *International Journal of Oncology* **42**, 848–862 (2013).
31. Zhao, Y. *et al.* Targeting the cMET pathway augments radiation response without adverse effect on hearing in NF2 schwannoma models. *Proc Natl Acad Sci USA* **115**, E2077–E2084 (2018).
32. Helbing, D.-L., Schulz, A. & Morrison, H. Pathomechanisms in schwannoma development and progression. *Oncogene* **39**, 5421–5429 (2020).
33. Hartlehnert, M. *et al.* Schwann cells promote post-traumatic nerve inflammation and neuropathic pain through MHC class II. *Sci Rep* **7**, 12518 (2017).
34. Wang, Z. H., Walter, G. F. & Gerhard, L. The expression of nerve growth factor receptor on Schwann cells and the effect of these cells on the regeneration of axons in traumatically injured human spinal cord. *Acta Neuropathol* **91**, 180–184 (1996).

35. Ding, D. *et al.* Runx2 was Correlated with Neurite Outgrowth and Schwann Cell Differentiation, Migration After Sciatic Nerve Crush. *Neurochem Res* **43**, 2423–2434 (2018).
36. Wang, J.-B. *et al.* SPP1 promotes Schwann cell proliferation and survival through PKC $\alpha$  by binding with CD44 and  $\alpha\beta$ 3 after peripheral nerve injury. *Cell Biosci* **10**, 98 (2020).
37. Curtis, R. *et al.* GAP-43 is expressed by nonmyelin-forming Schwann cells of the peripheral nervous system. *Journal of Cell Biology* **116**, 1455–1464 (1992).
38. Hansen, M. R., Roehm, P. C., Chatterjee, P. & Green, S. H. Constitutive neuregulin-1/ErbB signaling contributes to human vestibular schwannoma proliferation. *Glia* **53**, 593–600 (2006).
39. Cheng, S. *et al.* A pan-cancer single-cell transcriptional atlas of tumor infiltrating myeloid cells. *Cell* **184**, 792-809.e23 (2021).
40. Kinker, G. S. *et al.* Pan-cancer single-cell RNA-seq identifies recurring programs of cellular heterogeneity. *Nat Genet* **52**, 1208–1218 (2020).
41. Mulder, K. *et al.* Cross-tissue single-cell landscape of human monocytes and macrophages in health and disease. *Immunity* **54**, 1883-1900.e5 (2021).
42. Ginhoux, F., Schultze, J. L., Murray, P. J., Ochando, J. & Biswas, S. K. New insights into the multidimensional concept of macrophage ontogeny, activation and function. *Nat Immunol* **17**, 34–40 (2016).
43. Newman, A. M. *et al.* Determining cell type abundance and expression from bulk tissues with digital cytometry. *Nat Biotechnol* **37**, 773–782 (2019).
44. Aaron, K. A. *et al.* What Genes Can Tell: A Closer Look at Vestibular Schwannoma. *Otology & Neurotology* **41**, 522–529 (2020).
45. Arthur-Farraj, P. J. *et al.* Changes in the Coding and Non-coding Transcriptome and DNA Methylome that Define the Schwann Cell Repair Phenotype after Nerve Injury. *Cell Reports* **20**, 2719–2734 (2017).

46. Li, M., Banton, M. C., Min, Q., Parkinson, D. B. & Dun, X. Meta-Analysis Reveals Transcription Factor Upregulation in Cells of Injured Mouse Sciatic Nerve. *Front. Cell. Neurosci.* **15**, 688243 (2021).
47. Wang, J. *et al.* CTCF-mediated chromatin looping in EGR2 regulation and SUZ12 recruitment critical for peripheral myelination and repair. *Nat Commun* **11**, 4133 (2020).
48. Ma, K. H., Hung, H. A. & Svaren, J. Epigenomic Regulation of Schwann Cell Reprogramming in Peripheral Nerve Injury. *Journal of Neuroscience* **36**, 9135–9147 (2016).
49. Jin, S. *et al.* Inference and analysis of cell-cell communication using CellChat. *Nat Commun* **12**, 1088 (2021).
50. Pruenster, M. *et al.* The Duffy antigen receptor for chemokines transports chemokines and supports their promigratory activity. *Nat Immunol* **10**, 101–108 (2009).
51. Ko, K. R., Lee, J., Lee, D., Nho, B. & Kim, S. Hepatocyte Growth Factor (HGF) Promotes Peripheral Nerve Regeneration by Activating Repair Schwann Cells. *Sci Rep* **8**, 8316 (2018).
52. de Vries, W. M., Briaire-de Bruijn, I. H., van Benthem, P. P. G., van der Mey, A. G. L. & Hogendoorn, P. C. W. M-CSF and IL-34 expression as indicators for growth in sporadic vestibular schwannoma. *Virchows Arch* **474**, 375–381 (2019).
53. Trias, E. *et al.* Schwann cells orchestrate peripheral nerve inflammation through the expression of CSF1, IL-34, and SCF in amyotrophic lateral sclerosis. *Glia* **68**, 1165–1181 (2020).
54. Martini, R., Fischer, S., López-Vales, R. & David, S. Interactions between Schwann cells and macrophages in injury and inherited demyelinating disease. *Glia* **56**, 1566–1577 (2008).
55. Prueter, J., Norvell, D. & Backous, D. Ki-67 index as a predictor of vestibular schwannoma regrowth or recurrence. *J. Laryngol. Otol.* **133**, 205–207 (2019).
56. Lewis, D. *et al.* Inflammation and vascular permeability correlate with growth in sporadic vestibular schwannoma. *Neuro-Oncology* **21**, 314–325 (2019).
57. Breun, M. *et al.* CXCR4: A new player in vestibular schwannoma pathogenesis. *Oncotarget* **9**, (2018).

58. Hannan, C. J. *et al.* The inflammatory microenvironment in vestibular schwannoma. *Neuro-Oncology Advances* **2**, vdaa023 (2020).
59. de Vries, M. *et al.* Tumor-Associated Macrophages Are Related to Volumetric Growth of Vestibular Schwannomas: *Otology & Neurotology* **34**, 347–352 (2013).
60. Kandathil, C. K., Cunnane, M. E., McKenna, M. J., Curtin, H. D. & Stankovic, K. M. Correlation Between Aspirin Intake and Reduced Growth of Human Vestibular Schwannoma: Volumetric Analysis. *Otology & Neurotology* **37**, 1428–1434 (2016).
61. Hagan, N. *et al.* CSF1R signaling is a regulator of pathogenesis in progressive MS. *Cell Death Dis* **11**, 904 (2020).
62. Fleming, S. J. *et al.* Unsupervised removal of systematic background noise from droplet-based single-cell experiments using CellBender. <http://biorxiv.org/lookup/doi/10.1101/791699> (2019) doi:10.1101/791699.
63. Wolock, S. L., Lopez, R. & Klein, A. M. Scrublet: Computational Identification of Cell Doublets in Single-Cell Transcriptomic Data. *Cell Systems* **8**, 281-291.e9 (2019).
64. Wolf, F. A., Angerer, P. & Theis, F. J. SCANPY: large-scale single-cell gene expression data analysis. *Genome Biol* **19**, 15 (2018).
65. Satija, R., Farrell, J. A., Gennert, D., Schier, A. F. & Regev, A. Spatial reconstruction of single-cell gene expression data. *Nat Biotechnol* **33**, 495–502 (2015).
66. Granja, J. M. *et al.* ArchR is a scalable software package for integrative single-cell chromatin accessibility analysis. *Nat Genet* **53**, 403–411 (2021).
67. Hao, Y. *et al.* Integrated analysis of multimodal single-cell data. *Cell* **184**, 3573-3587.e29 (2021).
68. Beaubier, N. *et al.* Clinical validation of the tempus xT next-generation targeted oncology sequencing assay. *Oncotarget* **10**, 2384–2396 (2019).
69. Browaeys, R., Saelens, W. & Saeys, Y. NicheNet: modeling intercellular communication by linking ligands to target genes. *Nat Methods* **17**, 159–162 (2020).

## ACKNOWLEDGEMENTS

We would like to acknowledge: Gelareh Zadeh and her laboratory for providing HSC cell lines, cell culture methods and sequencing data, Zarko Manojlovic for providing bulk RNA sequencing data, Miguel Torres-Martin for providing clinical data, Travis Law for assistance in implementation of scRNA-seq preprocessing methods, and Raleigh Kladney for immunohistochemistry assistance. Portions of figure 1A and 5E were created with BioRender.com.

## AUTHOR CONTRIBUTIONS

T.F.B. and B.P. contributed equally to the work and A.H.K., S.V.P. and A.A.P. jointly supervised the work. T.F.B. and B.P. performed experiments, data analysis, and manuscript and figure preparation. S.M.K., A.K.Y.Y., and S.P. assisted with data analysis. T.M. and R.D.Z.M. assisted with methods development. All authors contributed to manuscript review/editing.

## COMPETING INTERESTS STATEMENT

Regarding potential conflicts of interest, A.H.K. is a consultant for Monteris Medical and has received non-related research grants from Stryker and Collagen Matrix for study of a dural substitute. C.C.W. is a consultant for Stryker and Cochlear Ltd.

A

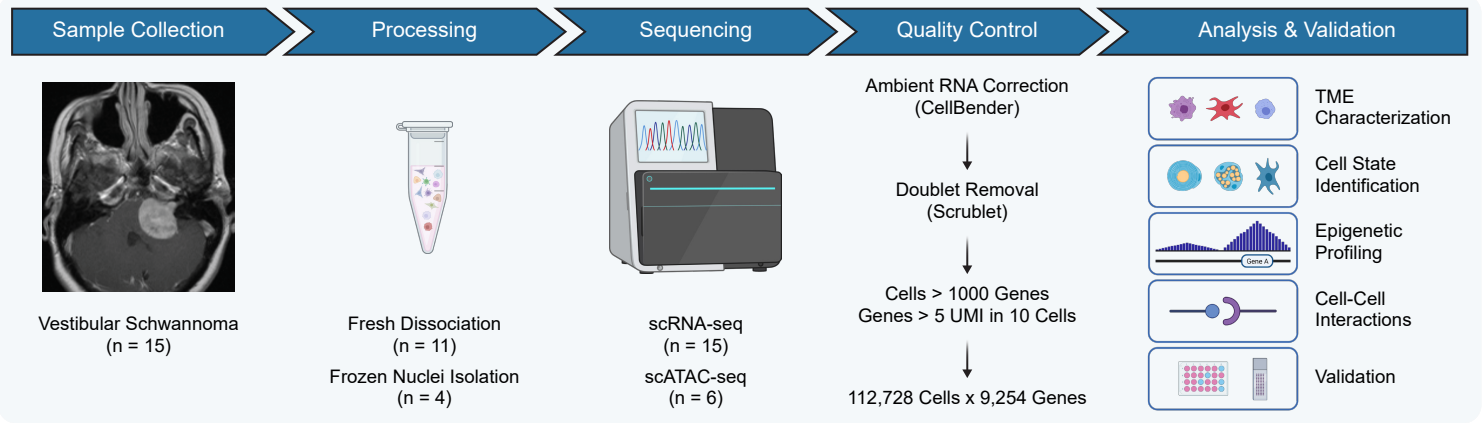

B

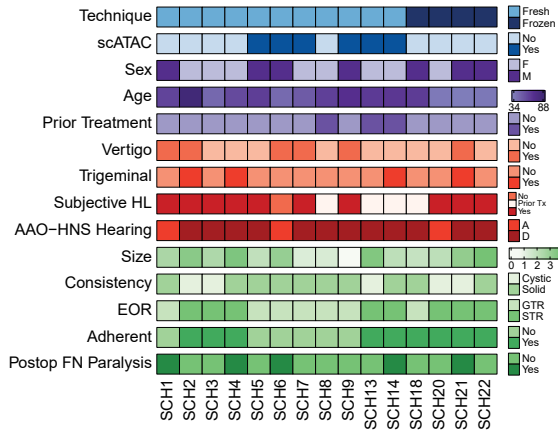

C

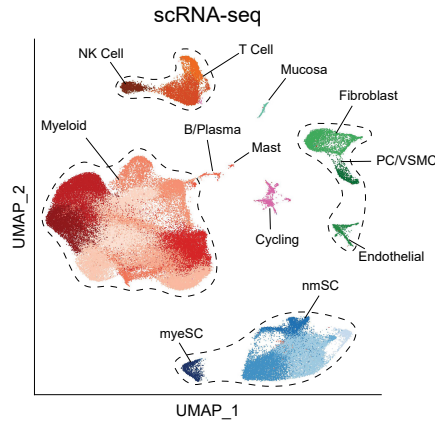

D

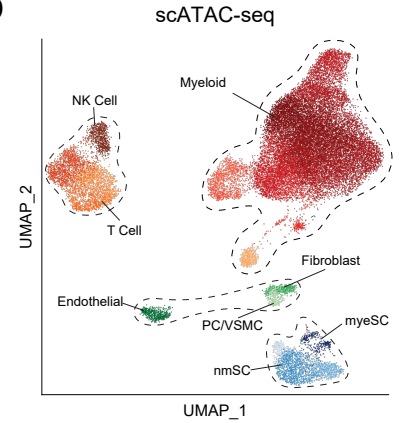

E

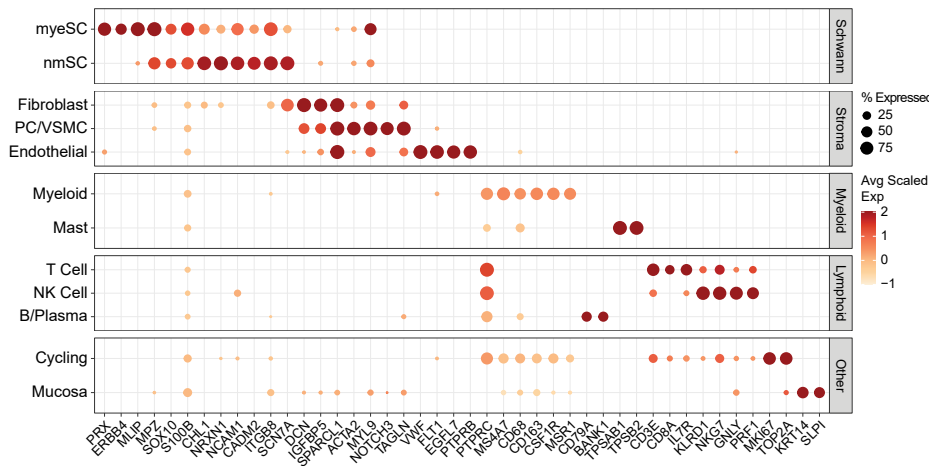

**Figure 1. scRNA-seq and scATAC-seq atlas of vestibular schwannoma (VS).**

- (A) Schematic of study design.
- (B) Clinical and demographic characteristics of tumors included in scRNA-seq and scATAC-seq datasets. AAO-HNS Hearing, American Association of Otolaryngology Head and Neck hearing score; EOR, extent of resection; FN, facial nerve. Size, greatest axial dimension in cm.
- (C) UMAP plot of cell types identified in the VS TME via scRNA-seq analysis. NK, natural killer cells; VSMC, vascular smooth muscle cells; nmSC, non-myelinating Schwann cells; myeSC, myelinating Schwann cells.
- (D) UMAP plot of cell types identified in the VS TME via scATAC-seq.
- (E) Dot plot of expression levels of selected marker genes (x-axis) for each VS cell subpopulation depicted in (C, y-axis).
- (F) Heatmap of meta-signature scores from gene signatures of previously published mouse peripheral nerve studies (see also Figure S1B).



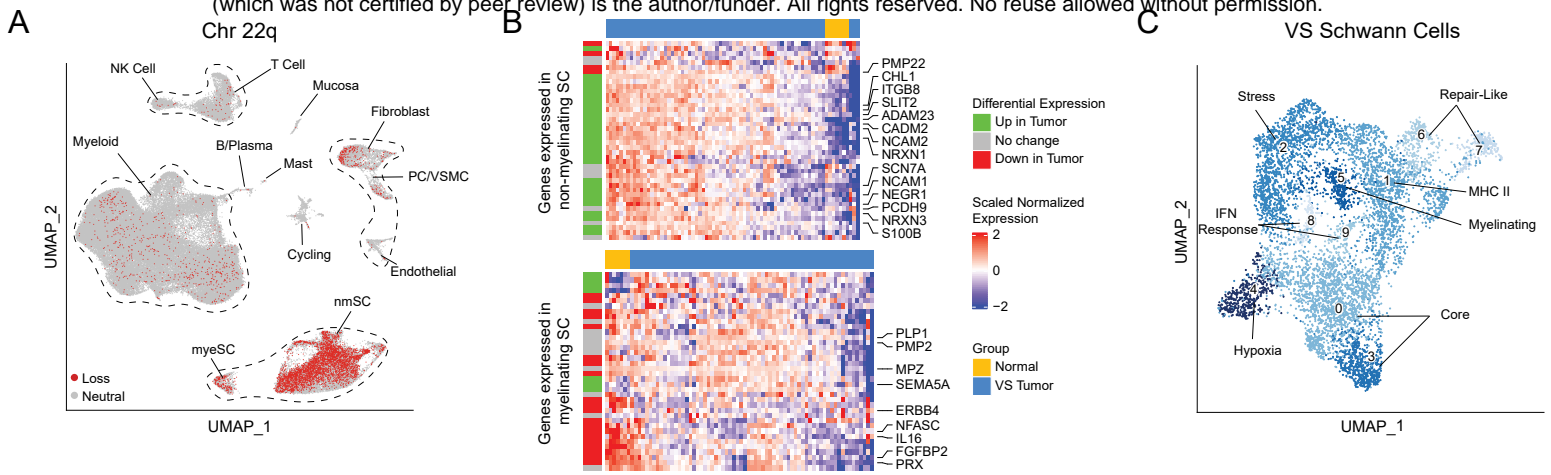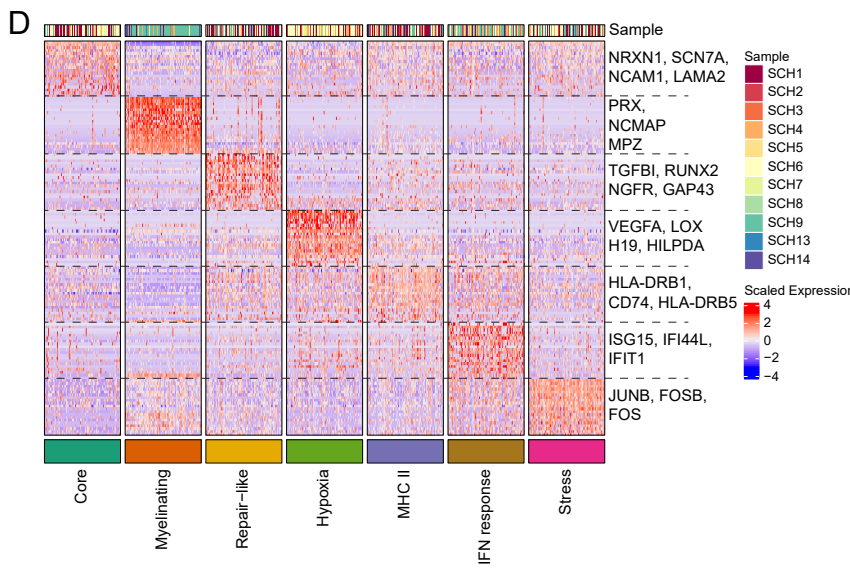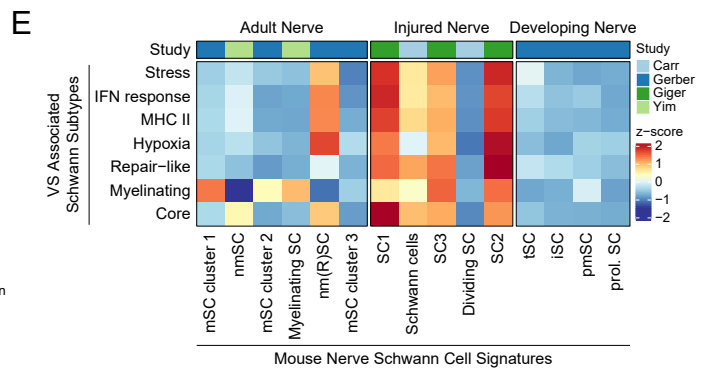

**Figure 2. VS Schwann cells have heterogeneous transcriptional profiles.**

- (A) UMAP plot of scRNA-seq VS data highlighting cells harboring inferred chromosome 22q (Chr 22q) loss showing enrichment in the nmSC and myeSC clusters. nmSC, nonmyelinating Schwann cells; myeSC myelinating Schwann cells.
- (B) Heatmaps comparing expression of top 50 differentially expressed genes (DEGs) in nmSC (top) and myeSC (bottom) to expression observed in microarray data of normal nerve and VS tumors from Gugel *et al.* (GSE141801).
- (C) UMAP representation of VS Schwann cells subset from the scRNA-seq data with meta-clusters labeled.
- (D) Heatmap of expression of DEGs from each SC meta-cluster. Two-hundred randomly sampled cells from each meta-cluster are displayed.
- (E) Heatmap depicting scoring of each VS Schwann cell cluster using signatures from murine adult normal nerve, adult injured nerve and developing nerve scRNA-seq atlases.

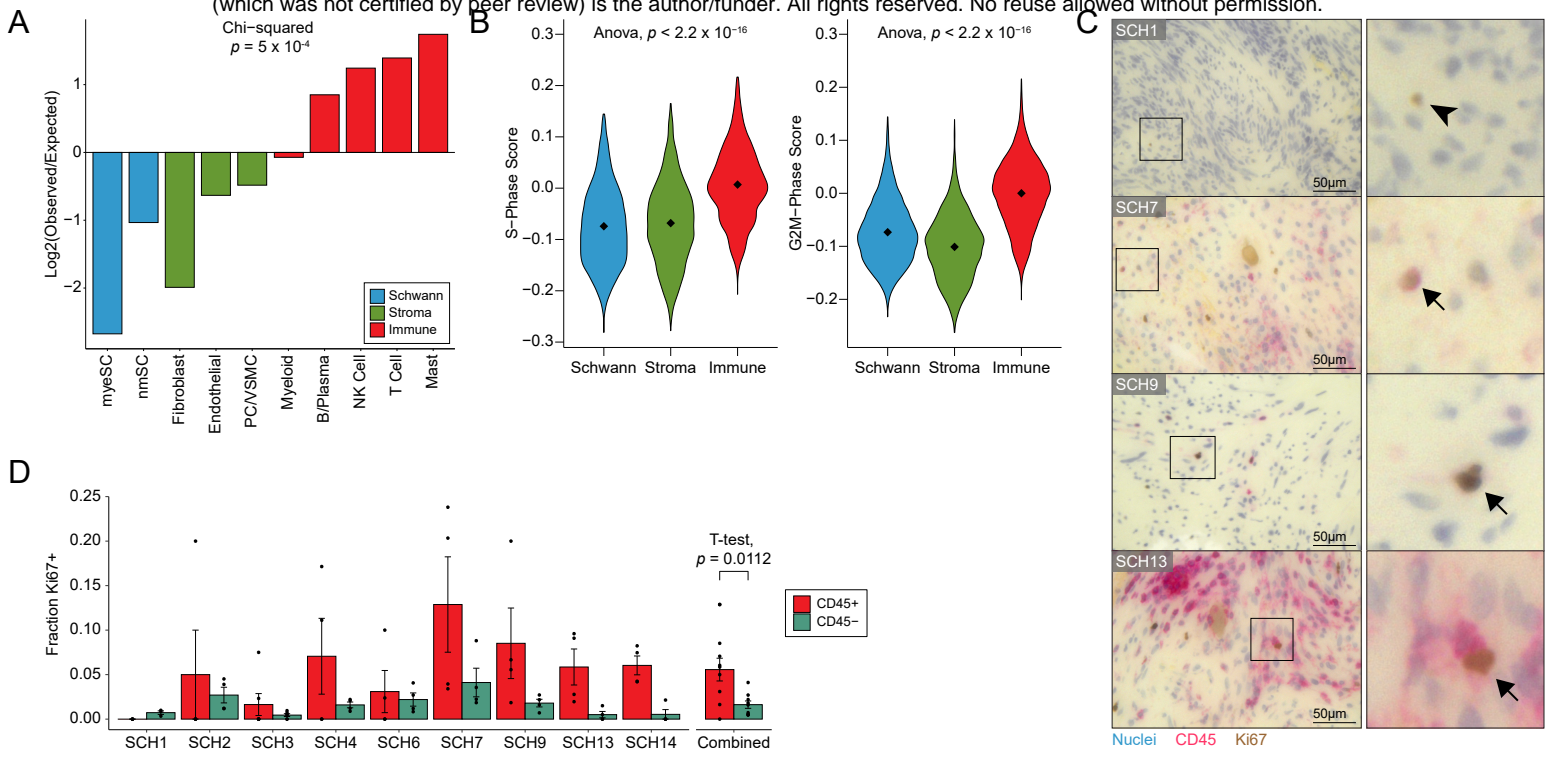

**Figure 3. Immune cells are disproportionately cycling in the VS TME.**

- (A) Cycling cells (Figure 1C) were scored based on gene signatures of all other cell types in the VS TME (*e.g.*, nmSC, T cells, *etc.*) and assigned to the cell type for which they scored highest. Frequencies of each cell type observed in this cluster were compared to expected rates.
- (B) Violin plots of G2M and S-phase scores for Schwann, stromal, and immune cells.
- (C) Double-stain IHC of representative high-power field (HPF) from VS tumor FFPE samples. Cycling cells are labeled Ki67 and immune cells are labeled with CD45. Arrowhead indicates a representative CD45-Ki67+ cell. Arrows indicate representative CD45+Ki67+ cells.
- (D) Barplot showing the fraction of CD45+ (red) and CD45- (green) cells that are Ki67+ within available samples (left) and averaged across all samples (right). Error bars on left show standard error for quantification of each group across 4 HPF. Error bars on the right represent standard error of mean measurements across samples.

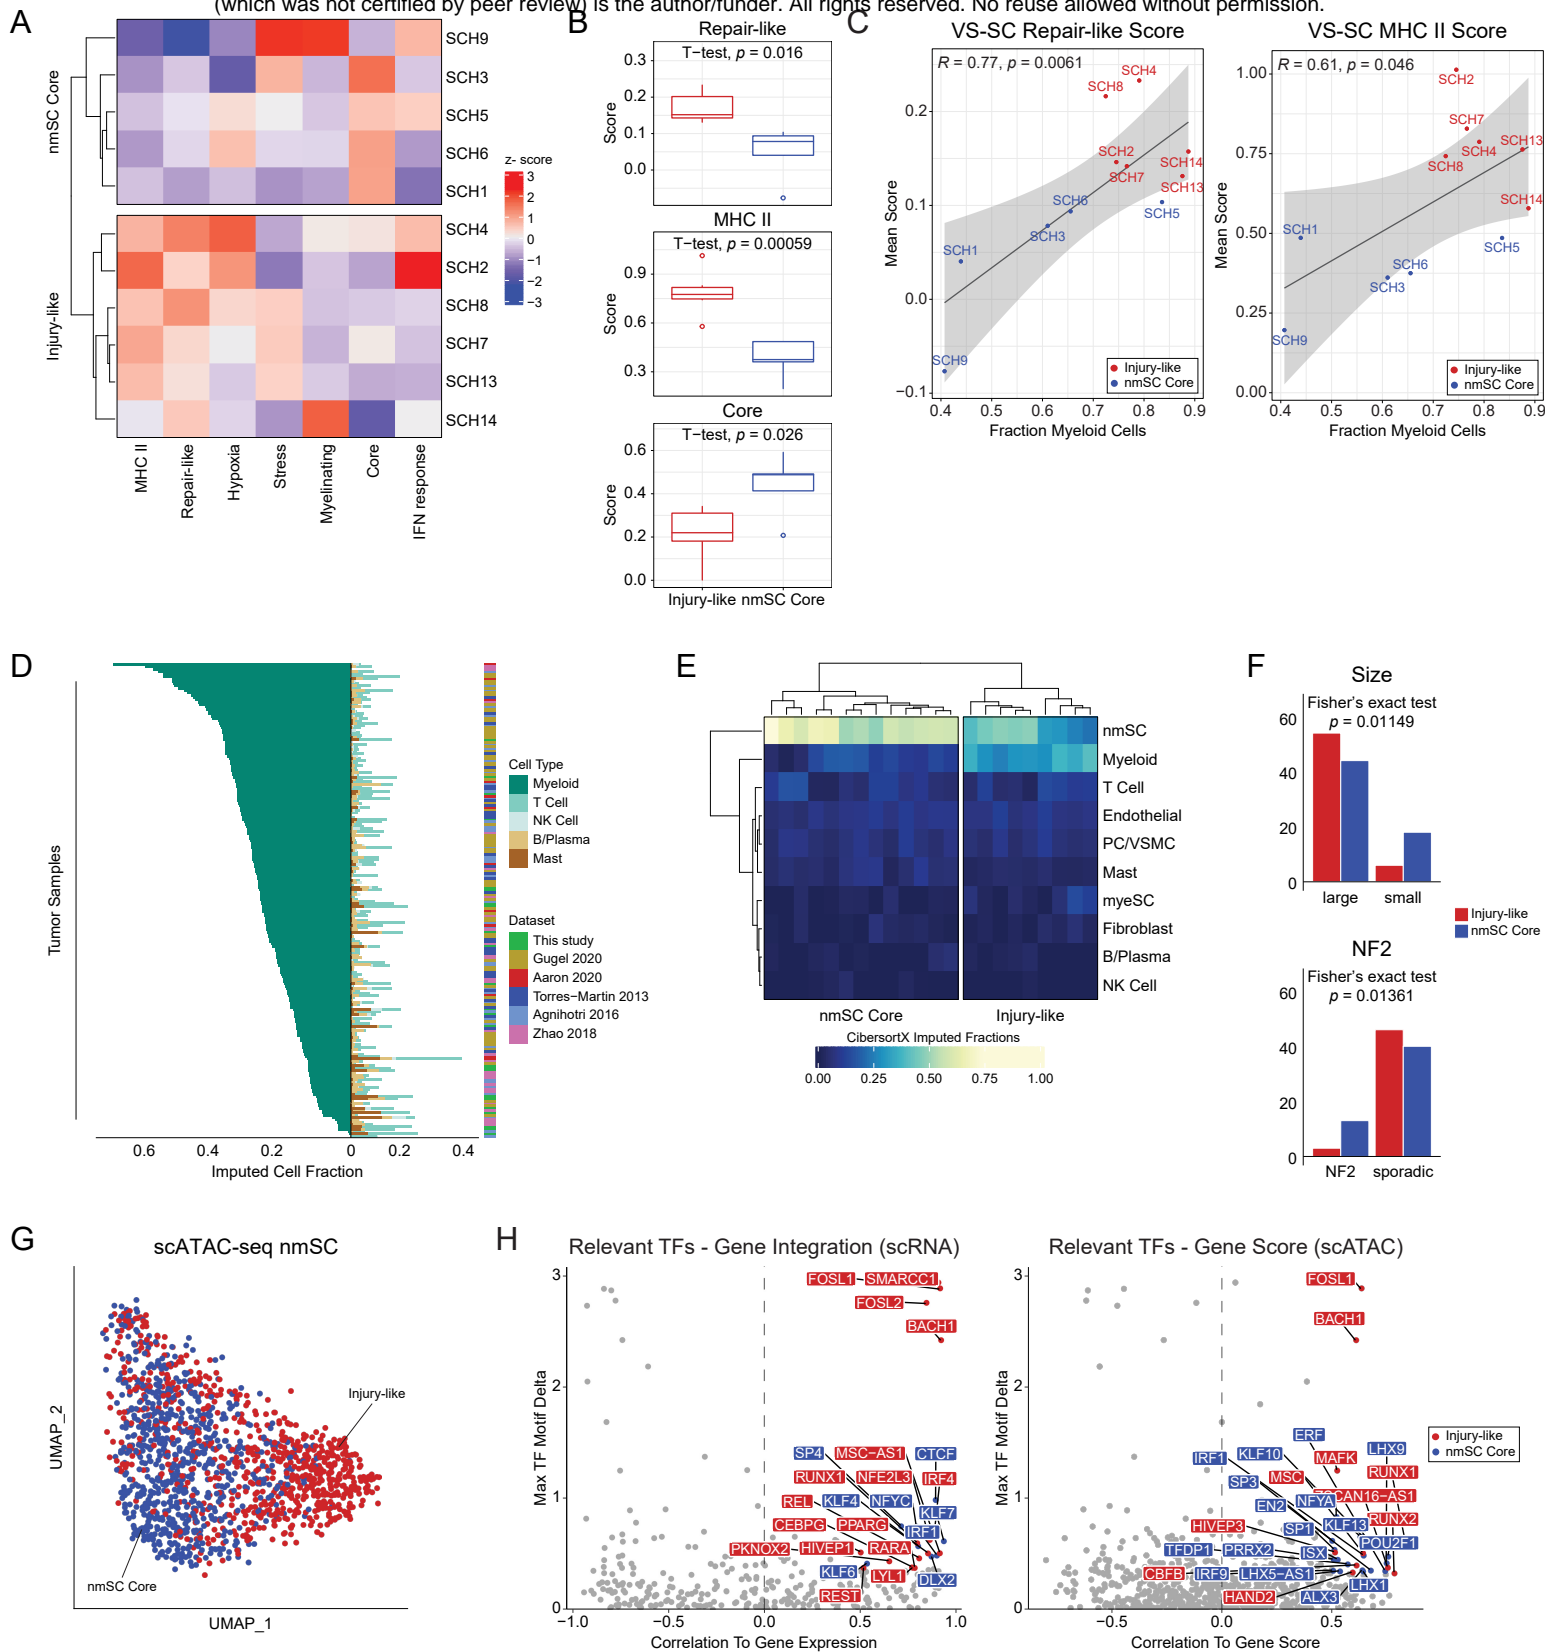

**Figure 4. Injury-like VS tumors are associated with increased myeloid cell infiltrate.**

- (A) Heatmap displaying results of hierarchical clustering of VS-SC subtype mean signature scores shows two distinct groups of tumors (“Injury-like” and “nmSC Core”).
- (B) Box-and-whisker plot comparing mean scores of repair-like, MHC II, and Core signatures in Injury-like and nmSC Core tumors. Two-sided t-testing was performed with correction for multiple comparisons via BH method with FDR of 0.2.
- (C) Scatterplots demonstrate strong correlation of mean repair-like (left) and MHC II (right) scores with fraction of myeloid cells across samples.
- (D) Barplot of imputed cell-type fractions from 175 VS tumors shows high variability in degree of myeloid cell composition. Mac, Myeloid; TC, T cell; NK, NK cell; BC, B cell; Mast, Mast cell.
- (E) Representative heatmap demonstrating classification of our cohort of 22 VS tumors into Injury-like and nmSC Core categories based on hierarchical clustering of imputed cell fractions. Remaining results shown in Figure S5B-F.
- (F) Barplots showing number of tumor samples classified as Injury-like or nmSC Core and clinically classified by size (n = 122) and NF2-syndrome status (n = 89).
- (G) UMAP of all VS-SC from the scATAC-seq dataset with cells colored based on the type of VS, Injury-like (red) and nmSC Core (blue), from which they arose as determined by clustering in (A).
- (H) Scatter plot depicting transcription factor (TF) motif deviation delta between Injury-like and nmSC Core VS-SC and correlation to gene expression (left) and gene score based on accessibility (right). Relevant TFs (correlation > 0.5, adjusted  $p < 0.01$  and max delta > 75th percentile of all max deltas) are labeled and colored.

A

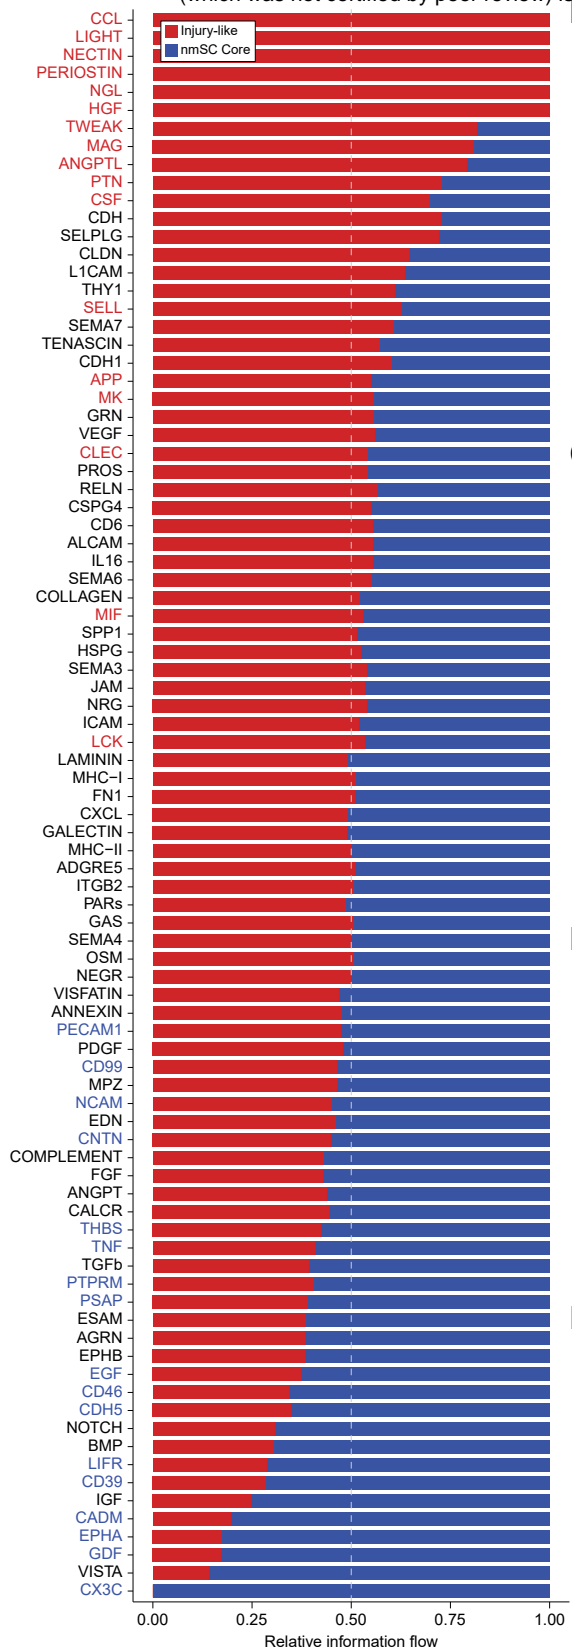

B

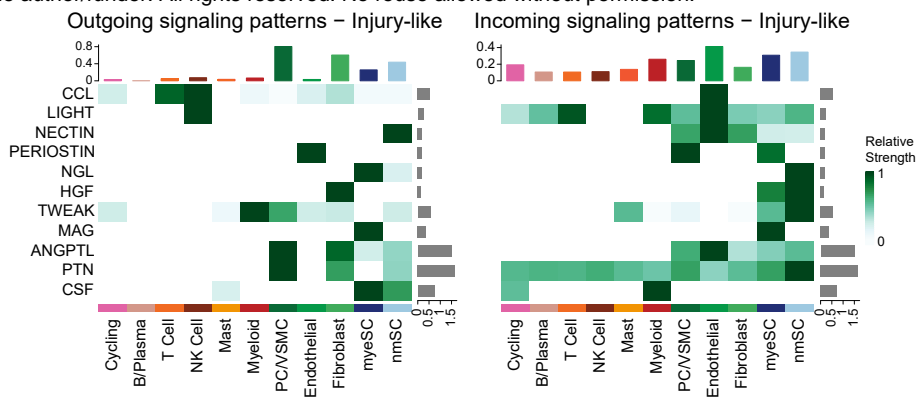

C

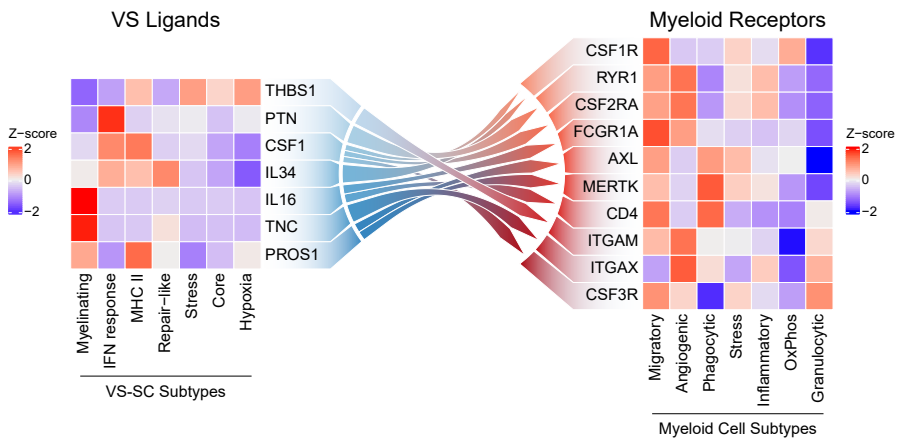

D

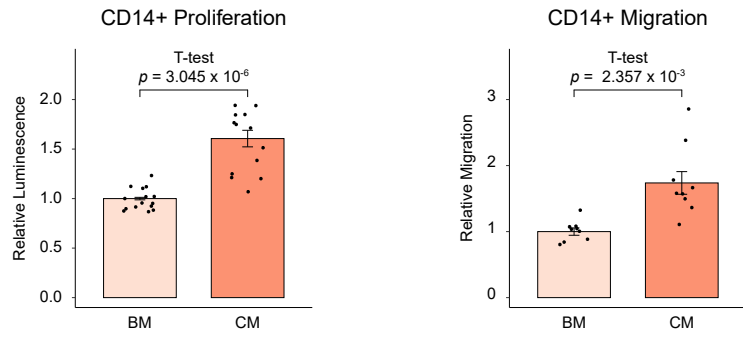

E

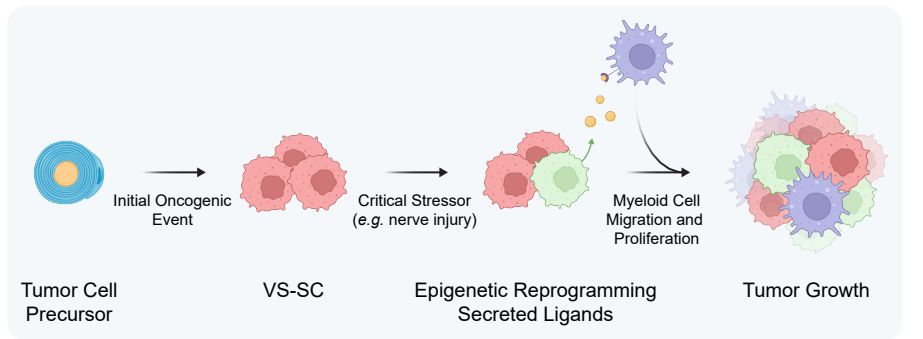

**Figure 5. Ligand-receptor interactions in the VS-TME distinguish Injury-like from nmSC Core tumors, and promote myeloid cell proliferation and migration.**

- (A) Bar plot showing the relative information flow of select signaling pathways. Pathway names in red are enriched in Injury-like VS and those in blue are enriched in Core VS. Information flow is defined as the sum of communication probability among all pairs of cell groups in each inferred network.
- (B) Heatmap displaying the relative interaction strength of signaling pathways enriched in Injury-like VS. Top barplots show summative contribution of individual cell types. Side barplots show summative contribution of a given pathway to the inferred communication network.
- (C) Heatmap showing relative expression of VS-SC ligands (left) with receptors expressed on myeloid cells (right).
- (D) Barplots showing relative transwell migration (left) and proliferation at 48 hours (right) of CD14<sup>+</sup> monocytes from healthy donors in conditioned media (CM) and base media (BM) from immortalized human Schwann cells (HSC). Each bar represents the normalized mean of all technical replicates (n = 3 per migration assay, n = 5 per proliferation assay) across biological replicates (n = 3).
- (E) Model of Injury-like VS. VS-SC undergo a critical stressor that triggers subpopulations to adopt repair-like and antigen presenting states. Myeloid cells are recruited to the VS TME and proliferate locally, leading to tumor progression.



A

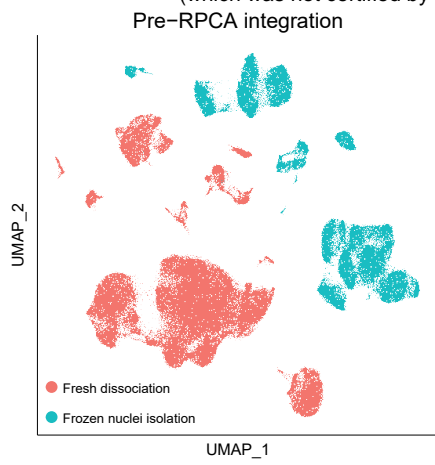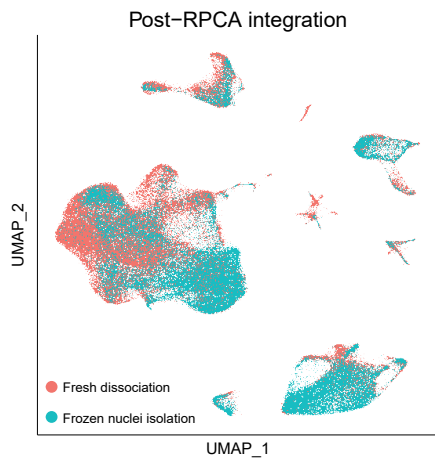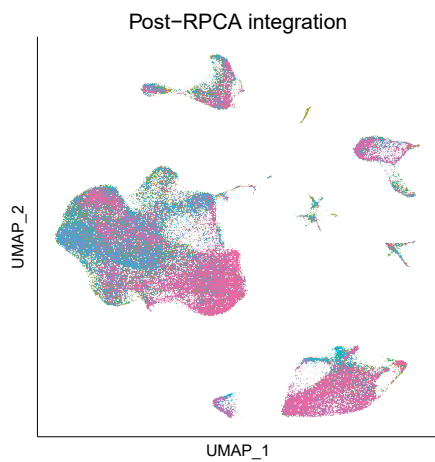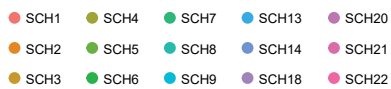

B

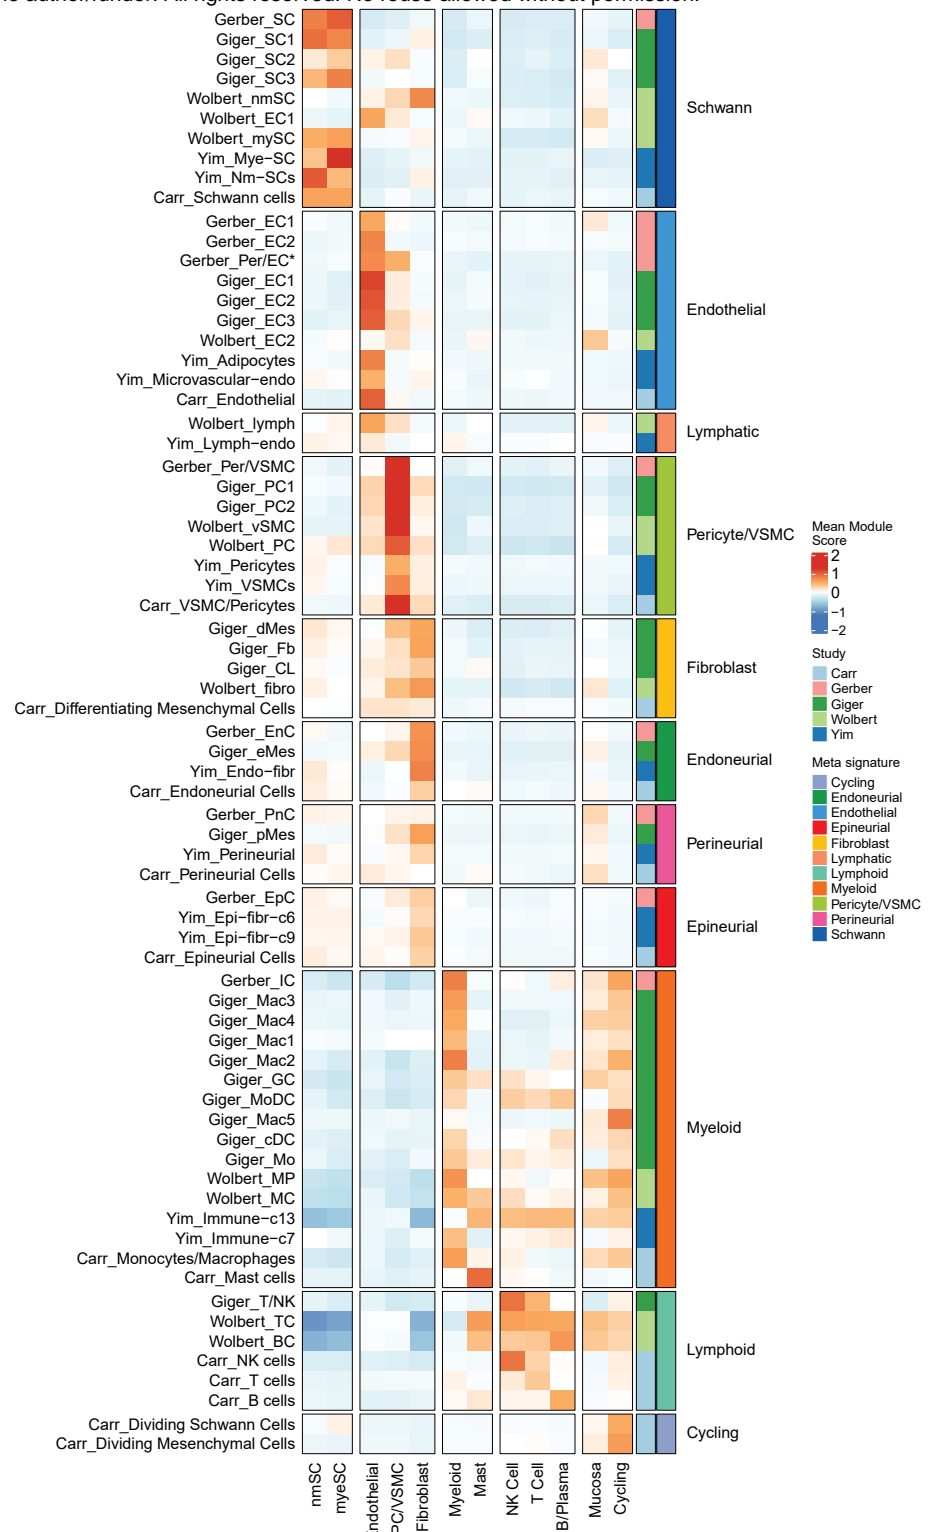

**Figure S1. scRNA-seq data integration and VS TME classification by peripheral nerve signatures**

- (A) UMAP plot of VS scRNA-seq dataset of embeddings pre-RPCA integration (top), post-integration (middle), and colored by individual sample. Batch effects associated with fresh tissue dissociation and nuclei isolation are overcome.
- (B) Heatmap showing average mouse peripheral nerve cell-type signature score (rows) for each VS cell-type cluster (columns).

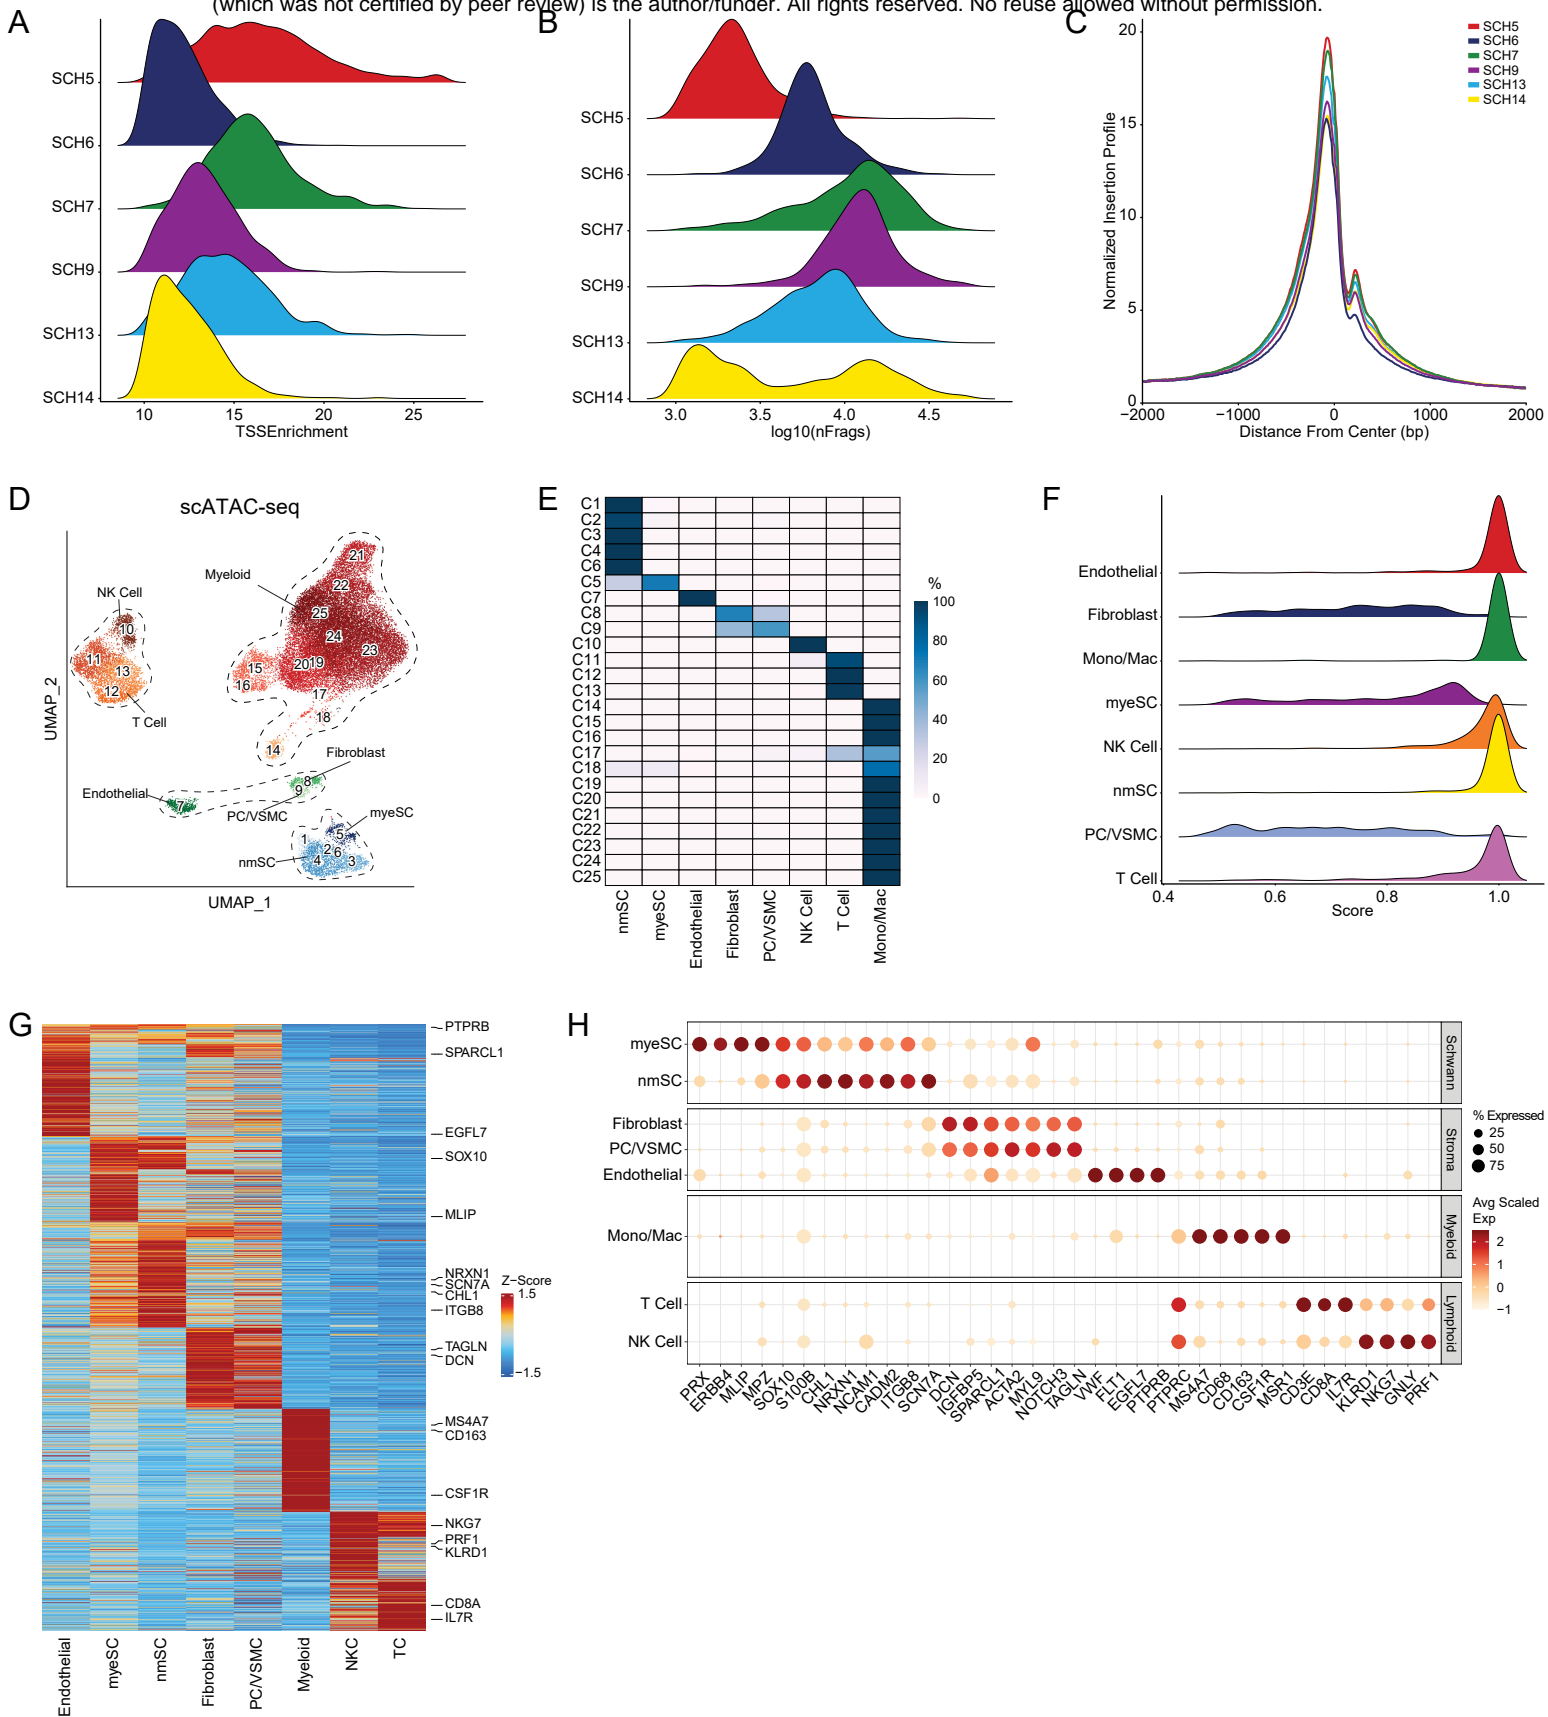

**Figure S2. scATAC-seq quality control and cell type assignment.**

- (A) Ridgeplot showing distribution of TSS Enrichment for each tumor after preprocessing (removal of cells TSS Enrichment < 10, number of fragments < 1000, and doublet removal as detailed in text).
- (B) Ridgeplot showing distribution of number of fragments per cell for each tumor after preprocessing.
- (C) TSS enrichment profile for each sample shows clear peak in center with smaller shoulder peak to the right, consistent with a well-positioned +1 nucleosome and good quality ATAC-seq data.
- (D) “Over-clustering” of scATAC-seq data at high resolution identifies 25 cell clusters which were initially labeled using inferred expression from gene accessibility of marker genes of various cell types. NK, natural killer cells; VSMC, vascular smooth muscle cells; nmSC, non-myelinating Schwann cells; myeSC, myelinating Schwann cells.
- (E) Confusion matrix generated after unconstrained linkage of cells from the scRNA-seq dataset with cells in the scATAC-seq dataset. scATAC-seq cells in most clusters were overwhelmingly linked with just one type of scRNA-seq cell. scATAC-seq clusters were ultimately labeled with the identity of the scRNA-seq cell type that most cells in the cluster were linked to.
- (F) Ridgeplot displaying distribution of score assigned to each scATAC-seq to scRNA-seq cell linkage by ArchR.
- (G) Heatmap of marker genes for each cell cluster identified from inferred gene expression based on chromatin accessibility.
- (H) Dot plot of expression levels of characteristic genes described in the literature for each VS cell subpopulation derived from expression data of scRNA-seq cells linked to scATAC-seq cells in each cluster.

A

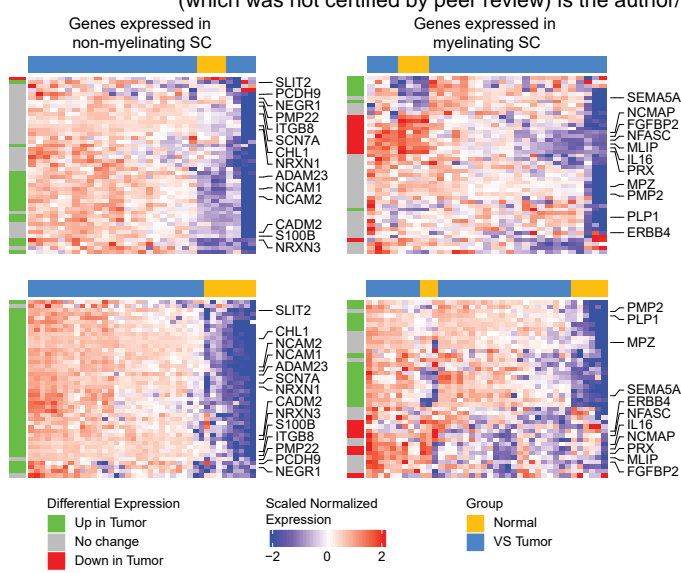

C

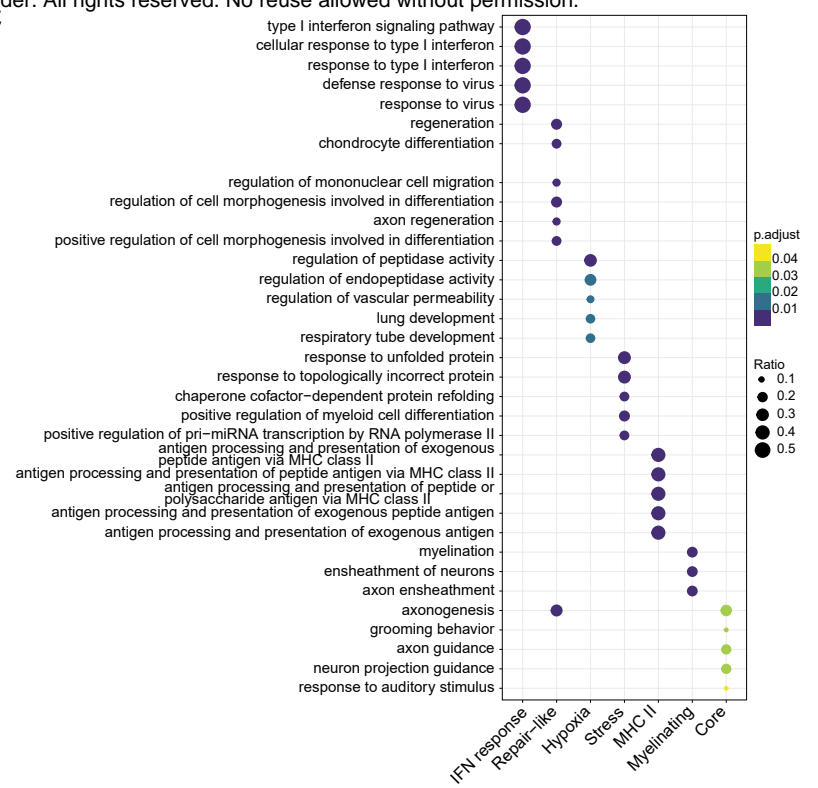

B

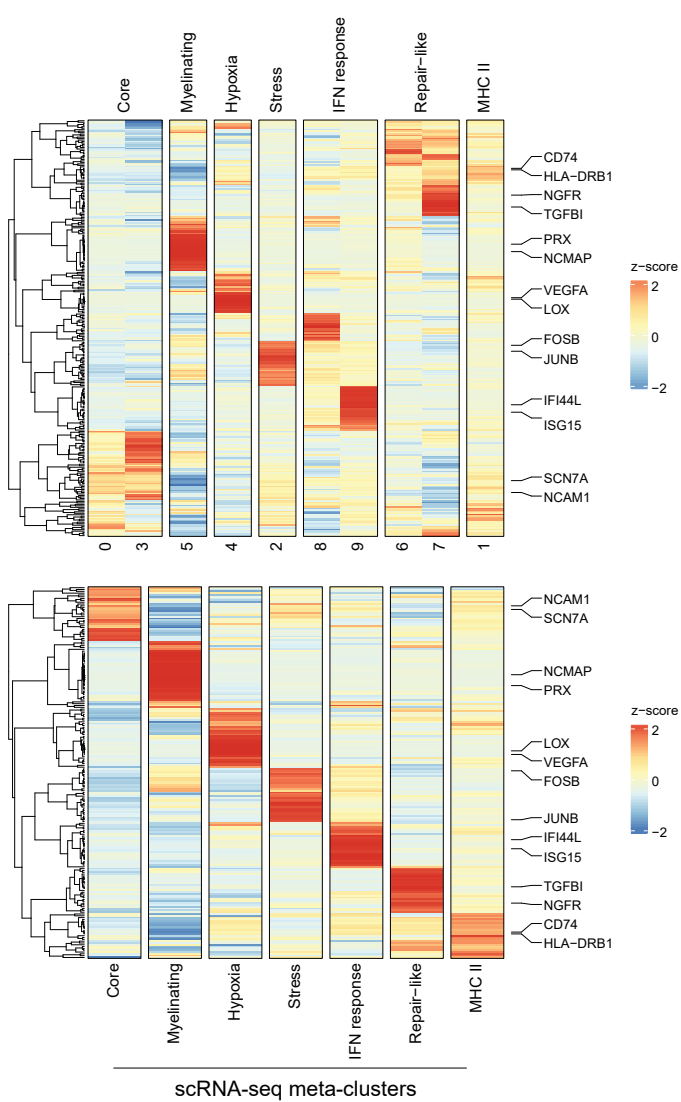

D

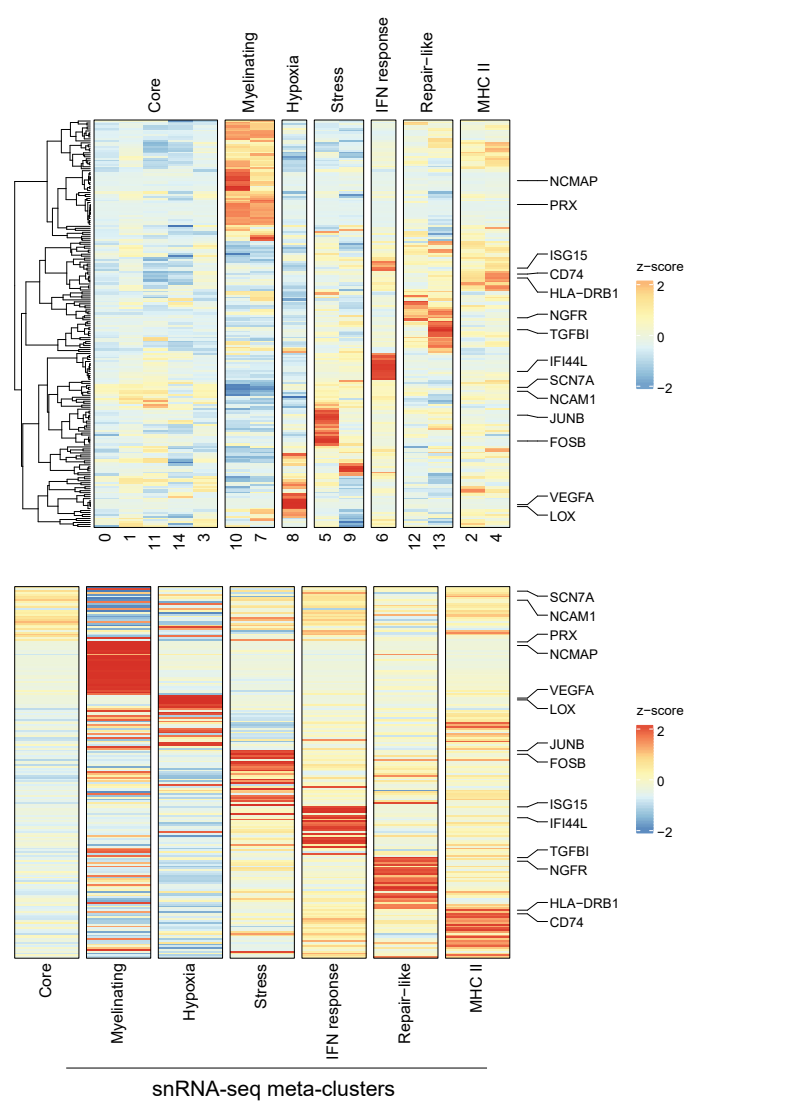

### Figure S3. Supplementary VS-SC analysis

- (A) Heatmaps comparing expression of top 50 differentially expressed genes (DEGs) in VS-nmSC and VS-myeSC to expression observed in microarray data of normal nerve and VS tumors (top, Zhao *et al.* (GSE108524); bottom, Torres-Martin *et al.* (GSE39645); see also Figure 2B).
- (B) Heatmap showing RPCA-based clustering results for VS SC subcluster (top) with hierarchical clustering of top 30 DEGs. Bottom heatmap shows final cluster-type labels and expression of cluster-defining genes.
- (C) Dot plot displaying results from GO BP enrichment analysis for top 25 DEGs from each VS-SC subtype.
- (D) Heatmaps showing RPCA-based clustering results for VS-SC from the snRNA-seq data, performed identically as in Figure S3B. There is strong correlation with gene expression and cluster assignment with samples from scRNA-seq analysis.

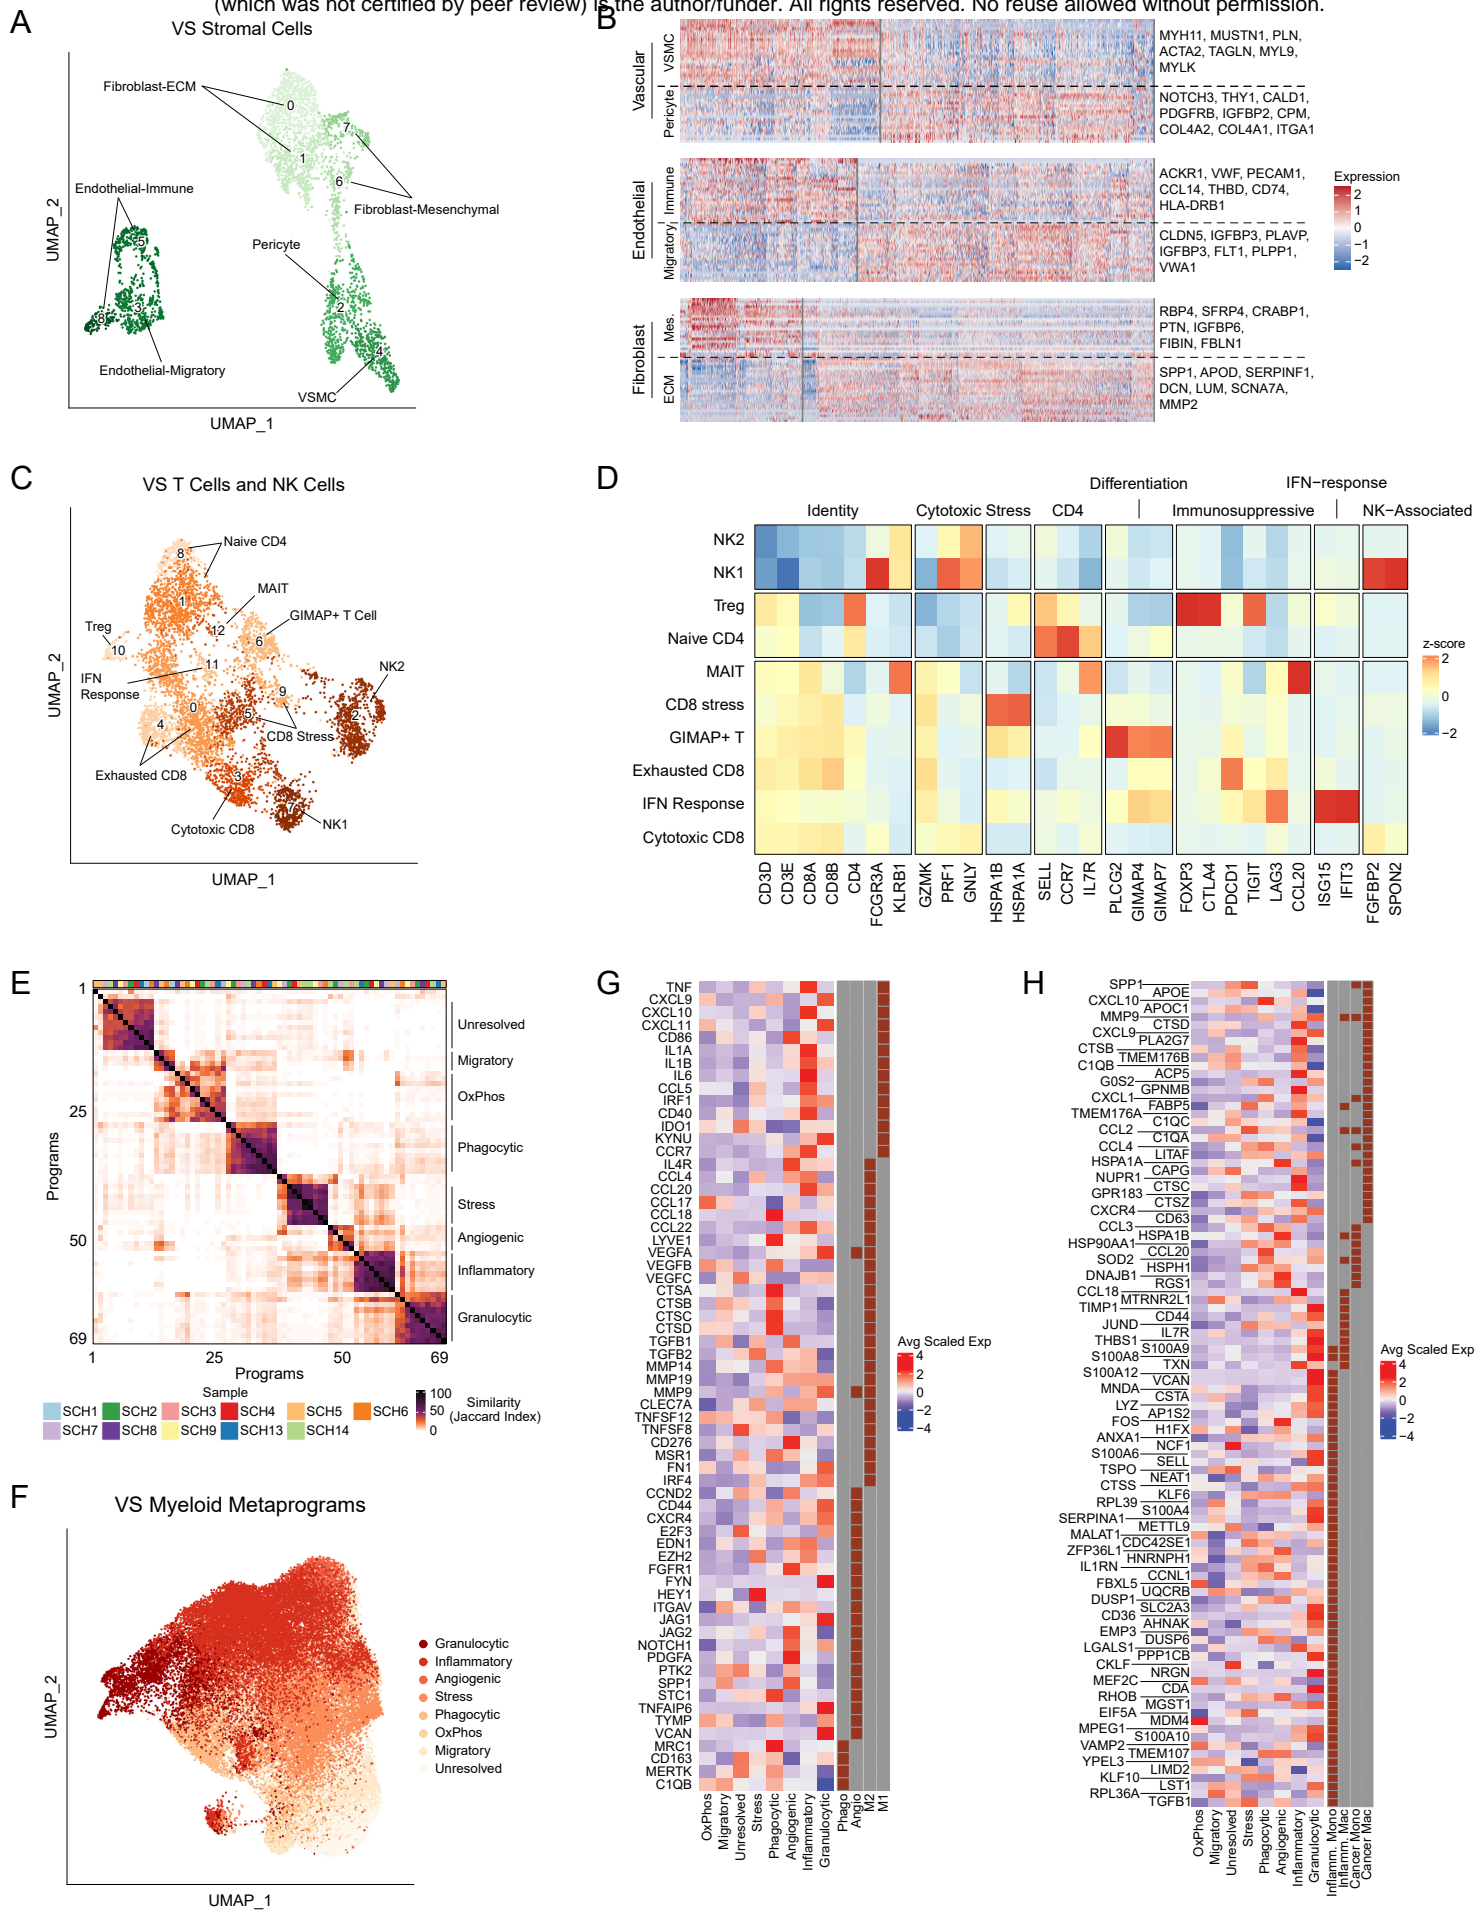

**Figure S4. Classification of cell states in stromal and immune cell populations.**

- (A) UMAP plot displaying stroma cell meta-cluster labels.
- (B) Heatmap showing representative gene expression for each stromal cell meta-cluster.
- (C) UMAP displaying NK and T cell meta-cluster labels.
- (D) Heatmap showing average expression across meta-clusters of known marker genes for NK and T cell phenotypes.
- (E) Heatmap displaying pairwise similarities between myeloid-cell programs, identified via NMF. Annotations on right designate meta-program (MP) labels.
- (F) Myeloid cells were scored for each MP identified in Figure S4A and assigned to the MP for which they scored highest.
- (G) Heatmap showing expression of cancer associated macrophage markers, as defined in a pan-cancer scRNA-seq analysis of tumor infiltrating macrophages<sup>39</sup>.
- (H) Heatmap showing expression of monocyte/macrophage markers expressed in the setting of inflammation and cancer, as defined in pan-tissue scRNA-seq analysis of myeloid cells<sup>41</sup>.



A

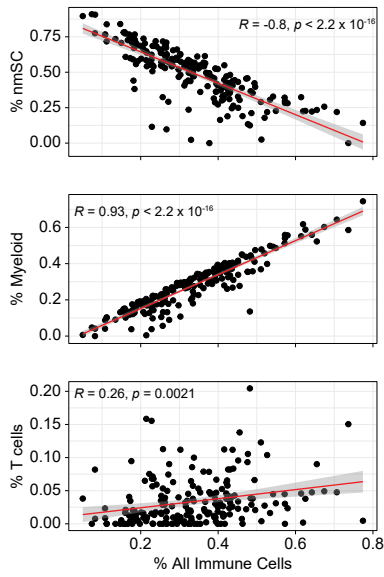

D

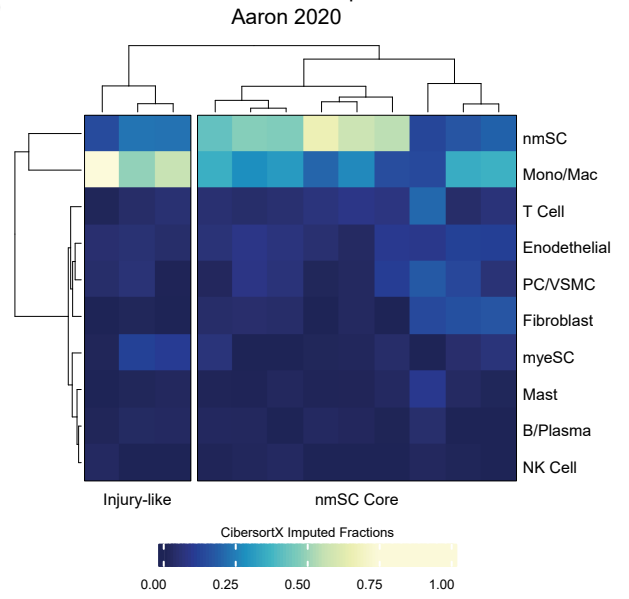

B

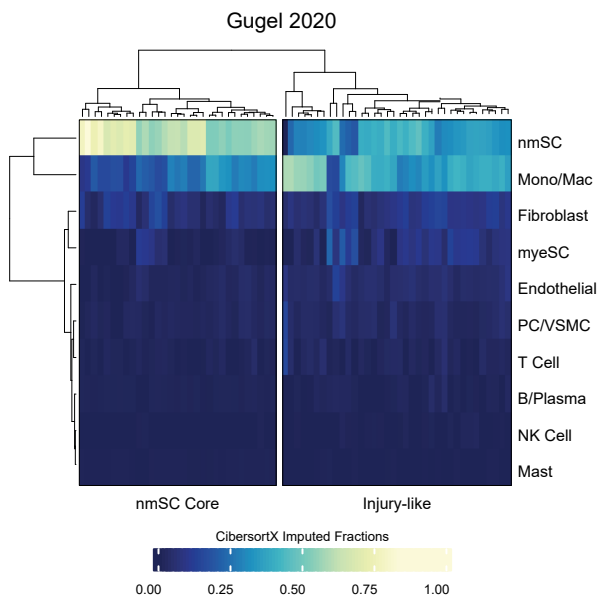

E

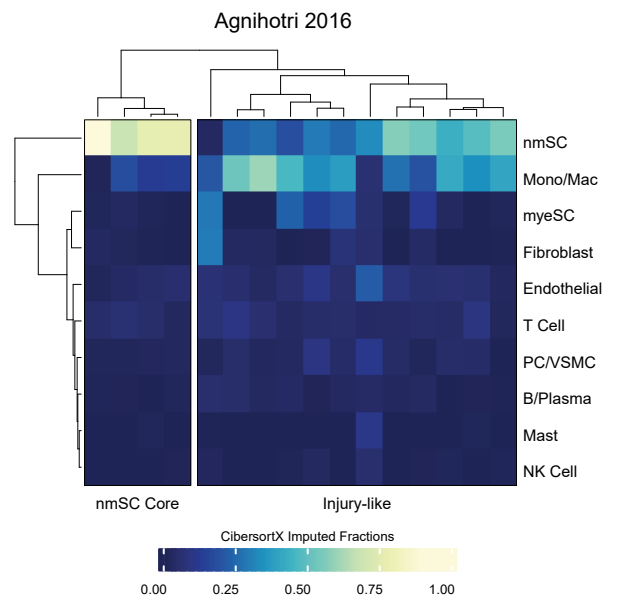

C

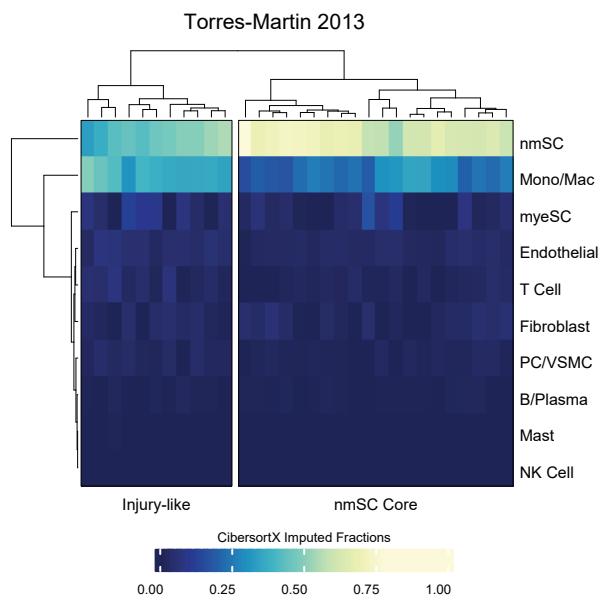

F

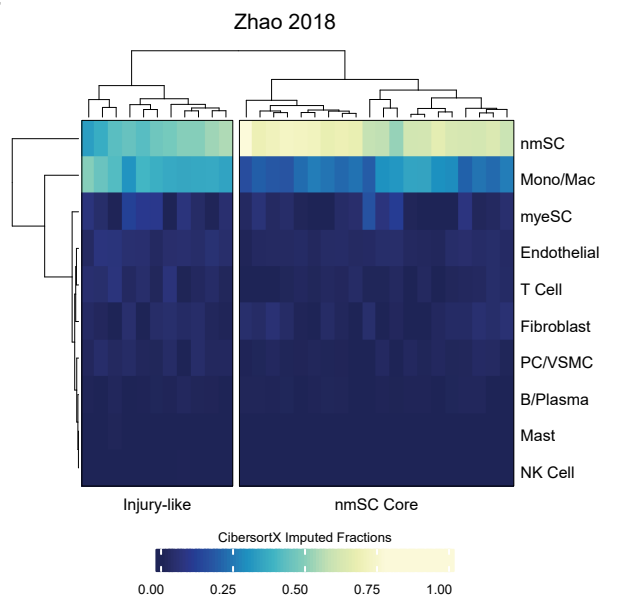

**Figure S5. Classification of deconvolved bulk RNA expression data.**

- (A) Correlation of imputed fractions of myeloid (top), T cell (middle), and nmSC (cells) with percentage of all immune cells in each deconvolved tumor sample.
- (B-F) Heatmaps displaying imputed cell fractions from CIBERSORTx deconvolution. VS tumors are classified into Injury-like and nmSC Core categories using hierarchical clustering of imputed cell fractions. BC, B cells; TC, T cells; NKC, Natural Killer Cells; PC/VSMC, pericyte/vascular smooth muscle cells; myeSC, myelinating Schwann cell; nmSC, non-myelinating Schwann cell.

A

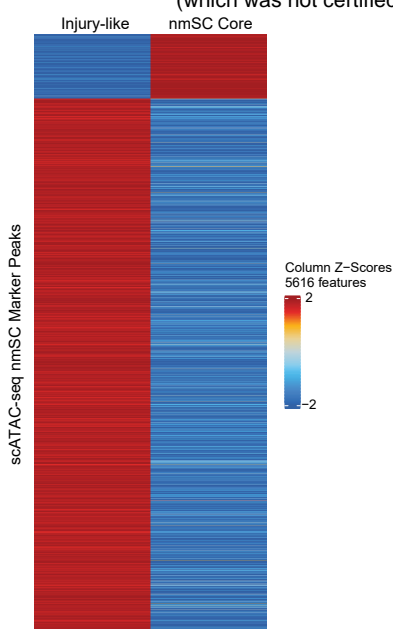

B

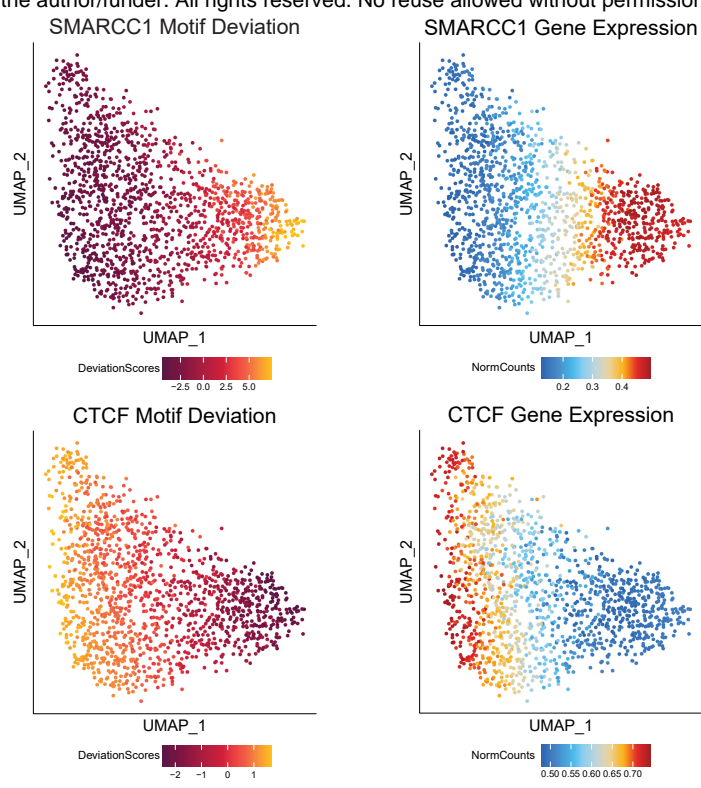

C

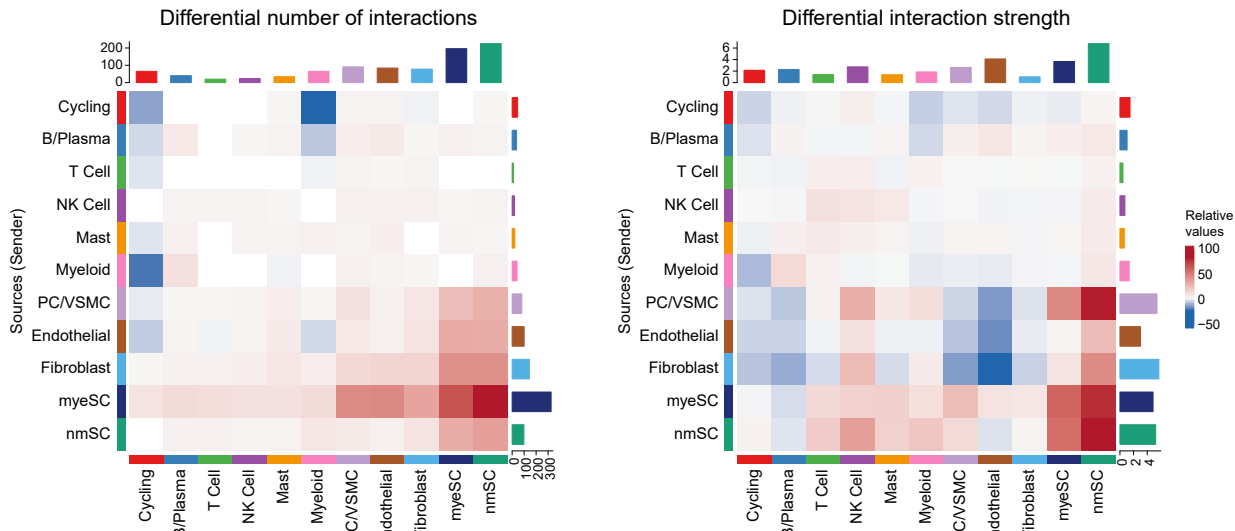

**Figure S6. Supplemental scATAC-seq and ligand-receptor analyses.**

- (A) Heatmap showing differentially accessible peaks (DAPs) identified 5616 statistically significant marker peaks with  $\text{Log}_2\text{FC} \geq 2$  differentiating VS-SC in Injury-like and nmSC Core tumors.
- (B) UMAP of Motif Deviation and Gene Expression of select genes specific to nmSC Core and Injury-like VS SC.
- (C) Heatmap show differential number of interactions (left) and interaction strength (right), displayed as Injury-like VS relative to nmSC Core VS. The top colored bar plot represents the sum of column of values displayed (*i.e.*, incoming signals). The right colored bar plot represents the sum of row of values (*i.e.*, outgoing signals). Red and blue colors in the color scale represent increased and decreased signaling, respectively, in Injury-like VS nmSC Core tumors. BC, B cells; TC, T cells; NKC, Natural Killer Cells; PC/VSMC, pericyte/vascular smooth muscle cells; myeSC, myelinating Schwann cell; nmSC, non-myelinating Schwann cell.
